# Supplementary material for: Theoretical Investigation of the Nonlinear Optical and Charge Transport Properties of N-(4-Methoxybenzylidene) Isonicotinohydrazone and Some of Its Derivatives: A DFT and TD-DFT Study
Source: Hindawi journal article supplement (doi:10.1155/2023/6588603), 2023-01-16
Supplement: f1 [file 6588603.f1.docx]

**Theoretical investigation of the non-linear optical and charge transport properties of N-(4-methoxybenzylidene)isonicotinohydrazone and some of its derivatives: A DFT and TD-DFT study**

**Charly Tsapi Tedjeuguim1, Stanley Numbonui Tasheh1,2, and Julius Numbonui Ghogomu1,2***

1Research Unit of Noxious Chemistry and Environmental Engineering, Department of Chemistry, Faculty of Science, University of Dschang, P.O Box 67, Dschang, Cameroon

2Department of Chemistry, Faculty of Science, The University of Bamenda, P. O. Box 39, Bambili, Bamenda, Cameroon

Correspondence should be addressed to Julius Numbonui Ghogomu; [ghogsjuju@hotmail.com](mailto:ghogsjuju@hotmail.com)

**Table S1:** B3LYP-D/6-311G(d,p) optimized geometrical coordinates of INH. The structure is global minima (absence of negative frequency).

**Electronic Energy = -856.216489 Hartree**

C -2.477282000 1.318881000 0.081179000

O -3.180831000 2.300618000 0.154936000

N -0.436558000 2.547564000 0.082186000

N -1.092855000 1.351270000 0.088787000

H -0.586319000 0.507693000 -0.156691000

C -3.057185000 -0.071777000 -0.019294000

C 0.846392000 2.539267000 0.061380000

C 1.786010000 1.399181000 0.101470000

C 2.936594000 1.432159000 -0.692922000

C 1.609119000 0.292405000 0.954873000

H 0.764231000 0.264428000 1.633147000

H 3.109650000 2.285111000 -1.340646000

C 2.526813000 -0.742870000 0.982070000

C 3.862643000 0.392684000 -0.683904000

H 2.403129000 -1.589047000 1.646588000

C 3.657275000 -0.709297000 0.153376000

O 4.487239000 -1.778468000 0.247618000

C 5.660306000 -1.807544000 -0.559472000

H 5.412340000 -1.788802000 -1.626569000

H 6.328666000 -0.971788000 -0.324263000

H 6.159007000 -2.745276000 -0.321894000

H 1.286765000 3.531131000 -0.015544000

C -4.382028000 -0.186773000 -0.441782000

C -2.377361000 -1.246370000 0.314228000

H -4.942726000 0.707360000 -0.682134000

H -1.359934000 -1.238561000 0.688008000

C -4.950613000 -1.452600000 -0.536242000

C -3.043012000 -2.464763000 0.191787000

H -2.535674000 -3.389818000 0.451130000

H -5.977110000 -1.566836000 -0.872222000

N -4.303794000 -2.583468000 -0.230612000

H 4.733135000 0.454140000 -1.322358000

**Table S2 :** B3LYP-D/6-311G(d,p) optimized geometrical coordinates of INH1. The structure is global minima (absence of negative frequency).

**Electronic Energy = -895.548597 Hartree**

C 2.707489000 1.342827000 -0.216189000

O 3.407672000 2.316814000 -0.375704000

N 0.660349000 2.548162000 -0.379567000

N 1.323501000 1.362521000 -0.250060000

H 0.817620000 0.547245000 0.079300000

C 3.293134000 -0.026838000 0.030447000

C -0.622649000 2.534405000 -0.363186000

C -1.560684000 1.396127000 -0.272579000

C -2.725335000 1.538787000 0.501951000

C -1.380510000 0.196950000 -0.970745000

H -0.530919000 0.074205000 -1.632198000

H -2.890726000 2.471772000 1.031958000

C -2.315672000 -0.831923000 -0.877956000

C -3.667937000 0.528893000 0.624567000

H -2.157135000 -1.740724000 -1.442052000

C -3.448484000 -0.675646000 -0.077103000

O -4.411227000 -1.622295000 0.086968000

C -4.278778000 -2.864278000 -0.595428000

H -4.271358000 -2.724635000 -1.682108000

H -3.369999000 -3.393858000 -0.288322000

H -5.150809000 -3.451407000 -0.313337000

H -1.067529000 3.526635000 -0.401257000

C 4.601172000 -0.092089000 0.511340000

C 2.634249000 -1.231984000 -0.226780000

H 5.146882000 0.824675000 0.694149000

H 1.632039000 -1.263001000 -0.638409000

C 5.173412000 -1.339685000 0.736671000

C 3.302698000 -2.428844000 0.023993000

H 2.812743000 -3.377842000 -0.175814000

H 6.186479000 -1.414853000 1.120939000

N 4.546461000 -2.498853000 0.503834000

C -4.904666000 0.679819000 1.468326000

H -5.806413000 0.548344000 0.863852000

H -4.939270000 -0.086579000 2.247733000

H -4.939980000 1.661947000 1.942044000

**Table S3:** B3LYP-D/6-311G(d,p) optimized geometrical coordinates of INH2. the structure is global minima (absence of negative frequency).

**Electronic Energy = -1087.331838 Hartree**

C -3.880008000 -1.395472000 -0.086792000

O -4.525006000 -2.415652000 -0.166754000

N -1.809965000 -2.439039000 -0.631562000

N -2.520367000 -1.312506000 -0.343139000

H -2.026091000 -0.466995000 -0.079423000

C -4.511349000 -0.079601000 0.298323000

C -0.548223000 -2.333534000 -0.835563000

C 0.305986000 -1.124518000 -0.862593000

C 1.566457000 -1.174415000 -0.256441000

C -0.079696000 0.061576000 -1.505964000

H -1.025454000 0.113250000 -2.032400000

H 1.869351000 -2.084366000 0.250428000

C 0.774259000 1.156998000 -1.517710000

C 2.436906000 -0.079691000 -0.241071000

H 0.501000000 2.076634000 -2.021048000

C 2.015452000 1.100056000 -0.886568000

O 2.793881000 2.232582000 -0.900789000

C 3.896977000 2.201860000 -1.817881000

H 4.592238000 1.391700000 -1.579024000

H 3.537501000 2.087210000 -2.846558000

H 4.406409000 3.158878000 -1.713353000

H -0.048614000 -3.287169000 -0.990967000

C -5.735660000 -0.124018000 0.966240000

C -3.979358000 1.177363000 -0.001718000

H -6.185558000 -1.082937000 1.189156000

H -3.053382000 1.295829000 -0.552561000

C -6.351102000 1.071441000 1.322101000

C -4.682108000 2.314547000 0.392598000

H -4.290741000 3.301961000 0.164239000

H -7.299544000 1.061483000 1.851188000

N -5.844088000 2.279296000 1.048727000

C 3.750292000 -0.181147000 0.445787000

C 4.560082000 -1.309563000 0.257322000

C 4.198562000 0.830991000 1.306625000

C 5.783824000 -1.425915000 0.910987000

H 4.235742000 -2.090938000 -0.421053000

C 5.419860000 0.710984000 1.961768000

H 3.586958000 1.711390000 1.453178000

C 6.217503000 -0.415804000 1.766634000

H 6.399547000 -2.303174000 0.747628000

H 5.748692000 1.499307000 2.629615000

H 7.169946000 -0.504592000 2.276614000

**Table S4:** B3LYP-D/6-311G(d,p) optimized geometrical coordinates of INH3. The structure is global minima (absence of negative frequency).

**Electronic Energy = -1408.092837 Hartree**

C -3.858004000 -1.391505000 -0.196119000

O -4.488114000 -2.413634000 -0.341019000

N -1.770998000 -2.371131000 -0.793021000

N -2.498351000 -1.274206000 -0.440865000

H -2.016906000 -0.439771000 -0.123225000

C -4.507686000 -0.110802000 0.267973000

C -0.509143000 -2.236662000 -0.976271000

C 0.323294000 -1.012488000 -0.915894000

C 1.560398000 -1.067836000 -0.267416000

C -0.068077000 0.194559000 -1.515020000

H -0.999672000 0.253076000 -2.065396000

H 1.857737000 -1.995563000 0.209203000

C 0.764668000 1.304475000 -1.448668000

C 2.411368000 0.041960000 -0.174544000

H 0.487973000 2.242346000 -1.915224000

C 1.987235000 1.242746000 -0.784722000

O 2.747842000 2.385259000 -0.727882000

C 3.830920000 2.431113000 -1.669838000

H 4.532356000 1.607675000 -1.506157000

H 3.448464000 2.392960000 -2.695565000

H 4.339300000 3.380122000 -1.504534000

H 0.007131000 -3.170246000 -1.187840000

C -5.726512000 -0.213160000 0.939384000

C -3.996233000 1.169344000 0.038754000

H -6.160741000 -1.190224000 1.108026000

H -3.076017000 1.332832000 -0.510254000

C -6.356412000 0.949926000 1.369603000

C -4.712854000 2.270676000 0.503571000

H -4.337993000 3.275670000 0.331049000

H -7.300432000 0.894634000 1.903757000

N -5.869025000 2.179206000 1.164499000

C 3.688425000 -0.043063000 0.545199000

C 4.314809000 0.915418000 1.304788000

S 4.637394000 -1.518005000 0.528020000

C 5.536365000 0.472818000 1.882115000

H 3.899322000 1.903342000 1.438097000

C 5.842386000 -0.817061000 1.554062000

H 6.159310000 1.087327000 2.518238000

H 6.702981000 -1.398913000 1.846684000

**Table S5:** B3LYP-D/6-311G(d,p) optimized geometrical coordinates of INH4. The structure is global minima (absence of negative frequency).

**Electronic Energy = -1254.432926 Hartree**

C -2.965027000 -1.358597000 -0.226681000

O -3.651225000 -2.341603000 -0.387961000

N -0.903816000 -2.516919000 -0.508945000

N -1.581963000 -1.350291000 -0.313467000

H -1.078771000 -0.535261000 0.020628000

C -3.565593000 -0.008147000 0.080321000

C 0.377795000 -2.481879000 -0.544678000

C 1.295483000 -1.325038000 -0.455471000

C 2.482310000 -1.463402000 0.277621000

C 1.065302000 -0.115501000 -1.122131000

H 0.193667000 0.001856000 -1.754418000

H 2.686381000 -2.404671000 0.777288000

C 1.981832000 0.928983000 -1.034488000

C 3.400977000 -0.426137000 0.389423000

H 1.787303000 1.846492000 -1.572619000

C 3.144040000 0.793874000 -0.274037000

O 4.081055000 1.768572000 -0.127639000

C 3.890570000 3.019186000 -0.783281000

H 2.977462000 3.513845000 -0.435708000

H 4.753917000 3.625790000 -0.516953000

H 3.853453000 2.896206000 -1.870826000

H 0.839509000 -3.462565000 -0.636413000

C -4.855921000 0.019109000 0.610213000

C -2.938012000 1.215613000 -0.167209000

H -5.378236000 -0.912231000 0.787577000

H -1.952505000 1.276574000 -0.614275000

C -5.441714000 1.249323000 0.890154000

C -3.617982000 2.392454000 0.140500000

H -3.152855000 3.355636000 -0.050502000

H -6.441175000 1.295202000 1.312657000

N -4.844372000 2.425809000 0.666598000

S 4.863502000 -0.684724000 1.375203000

H 5.443869000 0.493720000 1.084269000

**Table S6 :** B3LYP-D/6-311G(d,p) optimized geometrical coordinates of INH5. The structure is global minima (absence of negative frequency).

**Electronic Energy = -856.216489 Hartree**

C 2.752013000 -1.325688000 0.081521000

O 3.439056000 -2.319714000 0.131471000

N 0.694759000 -2.518988000 0.178721000

N 1.366683000 -1.334037000 0.146820000

H 0.865177000 -0.484738000 -0.089463000

C 3.350837000 0.053562000 -0.049808000

C -0.587684000 -2.499868000 0.202413000

C -1.516617000 -1.352001000 0.259303000

C -2.707098000 -1.409812000 -0.473462000

C -1.299816000 -0.221219000 1.066229000

H -0.424771000 -0.168166000 1.702309000

H -2.945823000 -2.266769000 -1.092516000

C -2.220657000 0.813339000 1.101733000

C -3.618802000 -0.371311000 -0.430871000

H -2.064147000 1.682816000 1.728171000

C -3.400374000 0.776732000 0.345509000

O -4.218444000 1.845081000 0.473658000

C -5.322809000 2.050090000 -0.420513000

H -4.995935000 2.026133000 -1.462611000

H -6.102786000 1.303395000 -0.265836000

H -5.701971000 3.040422000 -0.175076000

H -1.040184000 -3.487947000 0.156213000

C 4.655183000 0.144690000 -0.536911000

C 2.708980000 1.239770000 0.316031000

H 5.187655000 -0.759068000 -0.803921000

H 1.711291000 1.249264000 0.739626000

C 5.240729000 1.400319000 -0.660112000

C 3.389531000 2.446145000 0.160827000

H 2.912585000 3.380023000 0.444930000

H 6.251250000 1.496515000 -1.046269000

N 4.629774000 2.542228000 -0.323422000

F -4.755138000 -0.500859000 -1.162529000

**Table S7:** B3LYP-D/6-311G(d,p) optimized geometrical coordinates of INH6. The structure is global minima (absence of negative frequency).

**Electronic Energy = -1315.831517 Hartree**

C -2.955295000 -1.371808000 -0.047079000

O -3.639300000 -2.368427000 -0.040793000

N -0.902500000 -2.560535000 -0.241700000

N -1.574072000 -1.377857000 -0.187397000

H -1.063479000 -0.522683000 0.004601000

C -3.549288000 0.007977000 0.093794000

C 0.376789000 -2.541736000 -0.321732000

C 1.293418000 -1.382171000 -0.421560000

C 2.479804000 -1.396091000 0.321849000

C 1.050218000 -0.297828000 -1.279033000

H 0.171797000 -0.295905000 -1.913333000

H 2.707572000 -2.234517000 0.968732000

C 1.954649000 0.753120000 -1.358698000

C 3.376023000 -0.338443000 0.242980000

H 1.790927000 1.585789000 -2.032174000

C 3.123843000 0.756949000 -0.596685000

O 4.011339000 1.782358000 -0.735968000

C 3.947381000 2.791422000 0.284812000

H 2.968159000 3.282771000 0.278989000

H 4.141048000 2.369161000 1.274879000

H 4.722305000 3.516207000 0.041132000

H 0.835711000 -3.527210000 -0.294343000

C -4.817480000 0.107262000 0.666995000

C -2.937870000 1.186251000 -0.342876000

H -5.327477000 -0.791046000 0.990281000

H -1.972449000 1.186195000 -0.835790000

C -5.397263000 1.364474000 0.801734000

C -3.610509000 2.394555000 -0.169208000

H -3.158291000 3.322656000 -0.507549000

H -6.378967000 1.467955000 1.254480000

N -4.814547000 2.499175000 0.397506000

Cl 4.859891000 -0.399995000 1.173739000

**Table S8:** B3LYP-D/6-311G(d,p) optimized geometrical coordinates of INH7. The structure is global minima (absence of negative frequency).

**Electronic Energy = -3429.753076 Hartree**

C 3.474270000 -1.391901000 0.048582000

O 4.144882000 -2.397612000 0.036221000

N 1.419023000 -2.546636000 0.378640000

N 2.102305000 -1.375336000 0.258766000

H 1.592512000 -0.518592000 0.071917000

C 4.077447000 -0.024935000 -0.161849000

C 0.146181000 -2.505099000 0.524281000

C -0.744306000 -1.326357000 0.642265000

C -1.959076000 -1.326664000 -0.054730000

C -0.444921000 -0.235689000 1.473484000

H 0.460022000 -0.242283000 2.069512000

H -2.222128000 -2.169641000 -0.681859000

C -1.326573000 0.832149000 1.577449000

C -2.830823000 -0.249308000 0.045090000

H -1.120429000 1.667903000 2.235544000

C -2.526511000 0.847664000 0.863731000

O -3.391251000 1.889949000 1.025797000

C -3.262167000 2.943214000 0.057926000

H -2.266803000 3.398087000 0.111778000

H -3.443348000 2.572952000 -0.955557000

H -4.017700000 3.683841000 0.314682000

H -0.329107000 -3.482890000 0.546312000

C 5.319289000 0.039571000 -0.794703000

C 3.500918000 1.174437000 0.264726000

H 5.803017000 -0.875032000 -1.112625000

H 2.559079000 1.203036000 0.800568000

C 5.907750000 1.284056000 -0.994397000

C 4.179437000 2.367600000 0.022996000

H 3.754194000 3.311734000 0.351825000

H 6.869104000 1.360247000 -1.493828000

N 5.357857000 2.438446000 -0.600039000

Br -4.482493000 -0.286737000 -0.917288000

**Table S9:** B3LYP-D/6-311G(d,p) optimized geometrical coordinates of INH8. The structure is global minima (absence of negative frequency).

**Electronic Energy = -1060.761711 Hartree**

C -3.206667000 -1.326994000 -0.181542000

O -3.869756000 -2.330678000 -0.295128000

N -1.130692000 -2.456940000 -0.458382000

N -1.821627000 -1.294960000 -0.298625000

H -1.332033000 -0.461291000 0.008422000

C -3.828498000 0.019183000 0.092776000

C 0.148419000 -2.413048000 -0.529622000

C 1.050593000 -1.239610000 -0.529723000

C 2.244071000 -1.298081000 0.184559000

C 0.786408000 -0.070091000 -1.270103000

H -0.106313000 -0.010439000 -1.881387000

H 2.502786000 -2.175395000 0.763968000

C 1.684897000 0.979788000 -1.290382000

C 3.123505000 -0.217516000 0.205850000

H 1.510028000 1.857620000 -1.899612000

C 2.883943000 0.939415000 -0.559899000

O 3.683591000 2.010577000 -0.704966000

C 5.116683000 1.886647000 -0.717270000

H 5.528076000 2.092120000 0.269366000

H 5.418109000 0.886950000 -1.043531000

H 5.467283000 2.625147000 -1.437001000

H 0.621501000 -3.390437000 -0.586833000

C -5.107013000 0.036776000 0.651285000

C -3.232326000 1.246419000 -0.209185000

H -5.605377000 -0.898340000 0.872178000

H -2.259635000 1.314118000 -0.682615000

C -5.712390000 1.263454000 0.903793000

C -3.929960000 2.418843000 0.075823000

H -3.489660000 3.384376000 -0.156642000

H -6.702952000 1.303084000 1.347158000

N -5.144725000 2.443454000 0.628343000

N 4.254034000 -0.324519000 1.143847000

O 4.549557000 0.681426000 1.777226000

O 4.789016000 -1.417310000 1.268131000

**Table S10:** B3LYP-D/6-311G(d,p) optimized geometrical coordinates of INH9. The structure is global minima (absence of negative frequency).

**Electronic Energy = -969.571257 Hartree**

C 2.860360000 -1.365271000 0.297410000

O 3.523169000 -2.351261000 0.521393000

N 0.773835000 -2.474117000 0.592533000

N 1.474858000 -1.326697000 0.362506000

H 0.996627000 -0.524606000 -0.033756000

C 3.491156000 -0.044718000 -0.070466000

C -0.506926000 -2.416983000 0.612618000

C -1.403760000 -1.247494000 0.478791000

C -2.585277000 -1.369879000 -0.255359000

C -1.158511000 -0.021062000 1.119328000

H -0.283892000 0.090188000 1.749925000

H -2.839277000 -2.302736000 -0.747448000

C -2.037908000 1.049148000 1.005139000

C -3.480650000 -0.311450000 -0.395192000

H -1.816886000 1.970502000 1.525468000

C -3.202552000 0.920291000 0.237793000

O -4.108544000 1.909684000 0.061623000

C -3.892365000 3.174694000 0.684677000

H -4.740268000 3.791915000 0.395273000

H -3.865566000 3.080589000 1.775159000

H -2.966241000 3.638370000 0.329406000

H -0.987955000 -3.385206000 0.730393000

C 4.785124000 -0.070114000 -0.591552000

C 2.887475000 1.202160000 0.112956000

H 5.289260000 -1.019419000 -0.719318000

H 1.901639000 1.304523000 0.551664000

C 5.397865000 1.132809000 -0.927040000

C 3.593607000 2.348464000 -0.246779000

H 3.147872000 3.329303000 -0.105990000

H 6.400595000 1.137757000 -1.344099000

N 4.823455000 2.330612000 -0.765237000

C -4.713882000 -0.512306000 -1.200267000

O -4.984441000 -1.557240000 -1.750146000

H -5.384954000 0.361043000 -1.270607000

**Table S11:** B3LYP-D/6-311G(d,p) optimized geometrical coordinates of INH10. The structure is global minima (absence of negative frequency).

**Electronic Energy = -1044.840244 Hartree**

C 4.733067000 -1.183016000 -0.417089000

O 5.442820000 -2.131864000 -0.658027000

N 2.797301000 -2.504244000 0.001258000

N 3.403180000 -1.285278000 -0.035176000

H 2.833678000 -0.446015000 -0.025455000

C 5.238407000 0.236376000 -0.501936000

C 1.557925000 -2.565512000 0.323372000

C 0.641399000 -1.477399000 0.737812000

C -0.655129000 -1.447846000 0.216625000

C 1.014649000 -0.492726000 1.665330000

H 1.997622000 -0.518322000 2.120676000

H -0.939739000 -2.199752000 -0.511453000

C 0.107361000 0.490386000 2.039205000

C -1.584423000 -0.460514000 0.570896000

H 0.372661000 1.253762000 2.760754000

C -1.176332000 0.520640000 1.500424000

O -2.014590000 1.538781000 1.881657000

C -2.964853000 1.185696000 2.899424000

H -3.619787000 0.375647000 2.564378000

H -2.449002000 0.887450000 3.818383000

H -3.558588000 2.079424000 3.085654000

H 1.135373000 -3.565792000 0.262560000

C 6.388911000 0.465181000 -1.257480000

C 4.660331000 1.328717000 0.150405000

H 6.873742000 -0.365676000 -1.753698000

H 3.789263000 1.225985000 0.787335000

C 6.887582000 1.760554000 -1.346996000

C 5.245563000 2.584894000 0.002015000

H 4.817181000 3.447331000 0.504952000

H 7.775955000 1.964537000 -1.937484000

N 6.334834000 2.814174000 -0.734716000

C -2.930287000 -0.443449000 -0.016083000

C -3.720583000 0.630054000 -0.333114000

S -3.755514000 -1.944990000 -0.421988000

C -4.971010000 0.257659000 -0.908359000

H -3.420907000 1.651948000 -0.162409000

C -5.125733000 -1.100851000 -1.019434000

H -5.983032000 -1.622152000 -1.416678000

C -6.029926000 1.184058000 -1.355833000

O -7.082260000 0.852682000 -1.846451000

O -5.690147000 2.481310000 -1.150611000

H -6.431495000 3.014199000 -1.472928000

**Table S12:** B3LYP-D/6-311G(d,p) optimized geometrical coordinates of INH11. The structure is global minima (absence of negative frequency).

**Electronic Energy = -970.767798 Hartree**

C -2.927027000 -1.394138000 -0.087032000

O -3.577153000 -2.414401000 -0.101464000

N -0.836295000 -2.496884000 -0.371883000

N -1.552647000 -1.344104000 -0.253511000

H -1.066535000 -0.477033000 -0.051549000

C -3.568917000 -0.042152000 0.111319000

C 0.439862000 -2.417888000 -0.474615000

C 1.311448000 -1.223490000 -0.532288000

C 2.525273000 -1.254541000 0.174117000

C 1.005046000 -0.095705000 -1.301772000

H 0.110389000 -0.075524000 -1.912054000

H 2.770314000 -2.141459000 0.743481000

C 1.881036000 0.987131000 -1.328113000

C 3.404809000 -0.175340000 0.146958000

H 1.671462000 1.864718000 -1.927626000

C 3.069192000 0.973380000 -0.608214000

O 3.909603000 2.042893000 -0.722575000

C 4.204546000 2.768293000 0.480900000

H 3.279569000 3.111048000 0.958239000

H 4.779875000 2.161883000 1.181797000

H 4.791369000 3.631491000 0.169585000

H 0.936728000 -3.385506000 -0.499414000

C -4.835768000 -0.010818000 0.695300000

C -3.004112000 1.173854000 -0.282544000

H -5.310378000 -0.939069000 0.986350000

H -2.041877000 1.229255000 -0.778423000

C -5.460231000 1.218075000 0.881211000

C -3.718871000 2.349152000 -0.058510000

H -3.302296000 3.305290000 -0.362839000

H -6.442179000 1.267862000 1.342645000

N -4.922388000 2.388323000 0.517928000

O 4.603417000 -0.139687000 0.788858000

C 5.019828000 -1.286637000 1.522712000

H 5.999653000 -1.038336000 1.926322000

H 4.332377000 -1.506803000 2.346995000

H 5.107229000 -2.164659000 0.873617000

**Table S13:** B3LYP-D/6-311G(d,p) optimized geometrical coordinates of INH12. The structure is global minima (absence of negative frequency).

**Electronic Energy = -931.463119 Hartree**

C 2.700502000 1.335133000 -0.206418000

O 3.406794000 2.306437000 -0.354087000

N 0.660795000 2.553339000 -0.364192000

N 1.316547000 1.364261000 -0.239412000

H 0.803319000 0.546921000 0.073251000

C 3.277164000 -0.041209000 0.023741000

C -0.621751000 2.550030000 -0.344337000

C -1.565160000 1.414009000 -0.251302000

C -2.709862000 1.561812000 0.548730000

C -1.392793000 0.224971000 -0.970243000

H -0.555333000 0.113963000 -1.647780000

H -2.885379000 2.474724000 1.105637000

C -2.331505000 -0.805407000 -0.878868000

C -3.639163000 0.541144000 0.655699000

H -2.188161000 -1.709184000 -1.455759000

C -3.446436000 -0.657972000 -0.063033000

O -4.436972000 -1.580981000 0.128946000

C -4.358673000 -2.820785000 -0.568394000

H -4.374552000 -2.664696000 -1.652251000

H -3.455233000 -3.373362000 -0.289088000

H -5.237855000 -3.388668000 -0.270160000

H -1.061788000 3.544164000 -0.381125000

C 4.586330000 -0.120661000 0.499386000

C 2.608947000 -1.238935000 -0.243873000

H 5.138907000 0.790304000 0.690344000

H 1.604830000 -1.258807000 -0.651629000

C 5.150769000 -1.374506000 0.709179000

C 3.270009000 -2.442956000 -0.008270000

H 2.772731000 -3.386389000 -0.216245000

H 6.164604000 -1.460773000 1.089026000

N 4.514977000 -2.526731000 0.466171000

O -4.730707000 0.699281000 1.446188000

H -5.255503000 -0.110175000 1.387452000

**Table S14 :** B3LYP-D/6-311G(d,p) optimized geometrical coordinates of INH13. The structure is global minima (absence of negative frequency).

**Electronic Energy = -856.216489 Hartree**

C 2.699262000 1.340542000 -0.208031000

O 3.405956000 2.311936000 -0.357951000

N 0.657331000 2.553947000 -0.380641000

N 1.316872000 1.367638000 -0.244749000

H 0.801295000 0.549350000 0.061703000

C 3.277683000 -0.034270000 0.029668000

C -0.625628000 2.542181000 -0.367309000

C -1.562861000 1.402359000 -0.269826000

C -2.711668000 1.551201000 0.522530000

C -1.379407000 0.207063000 -0.973129000

H -0.541307000 0.090038000 -1.648685000

H -2.866759000 2.479009000 1.064705000

C -2.322064000 -0.819473000 -0.872088000

C -3.653285000 0.532920000 0.653090000

H -2.176316000 -1.727243000 -1.441808000

C -3.441966000 -0.671777000 -0.064213000

O -4.423781000 -1.607363000 0.106416000

C -4.311526000 -2.845395000 -0.584643000

H -5.186448000 -3.427249000 -0.299986000

H -4.310159000 -2.697645000 -1.670502000

H -3.405021000 -3.384691000 -0.288253000

H -1.069882000 3.534389000 -0.413285000

C 4.589695000 -0.109273000 0.498210000

C 2.608814000 -1.234687000 -0.224072000

H 5.142515000 0.803731000 0.678435000

H 1.601722000 -1.259089000 -0.624139000

C 5.156420000 -1.360903000 0.714588000

C 3.272185000 -2.436264000 0.017406000

H 2.773927000 -3.381572000 -0.179397000

H 6.172662000 -1.443289000 1.088966000

N 4.520230000 -2.515623000 0.484700000

N -4.752129000 0.635168000 1.490725000

H -5.064934000 1.569977000 1.701556000

H -5.498742000 -0.015564000 1.299632000

**Table S15:** B3LYP-D/6-311G(d,p) optimized geometrical coordinates of INH14. The structure is global minima (absence of negative frequency).**Electronic Energy = -948.475886 Hartree**

C 2.913425000 1.335256000 -0.110149000

O 3.589608000 2.333997000 -0.186565000

N 0.848766000 2.503721000 -0.303047000

N 1.527583000 1.326552000 -0.209075000

H 1.031051000 0.485479000 0.064562000

C 3.520671000 -0.030325000 0.094309000

C -0.431680000 2.475514000 -0.359660000

C -1.345638000 1.312435000 -0.404343000

C -2.534644000 1.351724000 0.313646000

C -1.102326000 0.176351000 -1.203427000

H -0.217251000 0.134652000 -1.827284000

H -2.770413000 2.221587000 0.915772000

C -1.997896000 -0.871989000 -1.238510000

C -3.461400000 0.290999000 0.297320000

H -1.820303000 -1.741803000 -1.858225000

C -3.185433000 -0.853987000 -0.486080000

O -3.935084000 -1.961882000 -0.629555000

C -5.143853000 -2.190455000 0.108734000

H -4.962409000 -2.159194000 1.184846000

H -5.916058000 -1.467567000 -0.158589000

H -5.460555000 -3.190276000 -0.181171000

H -0.894139000 3.459723000 -0.363128000

C 4.806158000 -0.089392000 0.633565000

C 2.904249000 -1.235285000 -0.253375000

H 5.319833000 0.828639000 0.888416000

H 1.924491000 -1.269284000 -0.715813000

C 5.398161000 -1.333706000 0.823741000

C 3.589738000 -2.428063000 -0.029853000

H 3.133548000 -3.376579000 -0.299029000

H 6.393810000 -1.405591000 1.251407000

N 4.811092000 -2.493041000 0.504658000

C -4.643041000 0.475838000 1.079256000

N -5.575546000 0.690452000 1.726915000

**Table S16:** B3LYP-D/6-311G(d,p) optimized geometrical coordinates of INH15. The structure is global minima (absence of negative frequency).

**Electronic Energy = -990.223000 Hartree**

C 3.207047000 -1.403121000 0.084893000

O 3.860577000 -2.421483000 0.092500000

N 1.120586000 -2.510949000 0.386699000

N 1.834591000 -1.356628000 0.262330000

H 1.344898000 -0.490048000 0.067129000

C 3.844139000 -0.048950000 -0.116105000

C -0.154226000 -2.431468000 0.504661000

C -1.023789000 -1.235502000 0.574052000

C -2.247690000 -1.265372000 -0.108698000

C -0.705504000 -0.110345000 1.344849000

H 0.195877000 -0.090658000 1.945268000

H -2.503010000 -2.163452000 -0.656424000

C -1.578630000 0.972675000 1.371257000

C -3.143286000 -0.188650000 -0.093951000

H -1.355316000 1.860741000 1.950412000

C -2.763359000 0.961494000 0.645919000

O -3.557638000 2.081757000 0.712736000

C -3.674824000 2.821444000 -0.514092000

H -2.691215000 3.180249000 -0.835525000

H -4.120532000 2.209894000 -1.302148000

H -4.316696000 3.673116000 -0.291988000

H -0.651150000 -3.398857000 0.533158000

C 5.107236000 -0.013583000 -0.707916000

C 3.279013000 1.165187000 0.283105000

H 5.582154000 -0.940320000 -1.003262000

H 2.319635000 1.217537000 0.784823000

C 5.727722000 1.217034000 -0.895702000

C 3.989631000 2.342482000 0.056510000

H 3.572713000 3.297161000 0.365009000

H 6.706690000 1.269802000 -1.363125000

N 5.189537000 2.385508000 -0.527180000

C -4.538638000 -1.242733000 -1.805382000

C -5.576210000 0.003274000 0.001254000

H -5.842142000 -0.897283000 0.575889000

H -5.436930000 0.831934000 0.690895000

H -6.406736000 0.243624000 -0.666936000

H -5.418586000 -0.998121000 -2.404016000

H -3.674125000 -1.273611000 -2.470711000

H -4.692151000 -2.247548000 -1.378180000

N -4.363096000 -0.207867000 -0.797576000

**Table S17:** B3LYP-D/6-311G(d,p) optimized geometrical coordinates of dimer of INH. The structure is global minima (absence of negative frequency).

**Electronic Energy = -1712.407320 Hartree**

C -2.609763000 -1.931763000 0.713357000

O -3.315981000 -2.294657000 1.626480000

N -0.574323000 -2.516223000 1.804049000

N -1.230254000 -2.052386000 0.701099000

H -0.706698000 -1.563445000 -0.016736000

C -3.181252000 -1.305171000 -0.536081000

C 0.706237000 -2.588515000 1.766619000

C 1.638613000 -2.293440000 0.658516000

C 2.848517000 -1.648810000 0.935237000

C 1.393620000 -2.686520000 -0.671900000

H 0.497651000 -3.247129000 -0.911965000

H 3.073153000 -1.357881000 1.955982000

C 2.305264000 -2.414736000 -1.676755000

C 3.769926000 -1.359202000 -0.067405000

H 2.128522000 -2.727362000 -2.698481000

C 3.497826000 -1.736830000 -1.386849000

O 4.316674000 -1.509179000 -2.444446000

C 5.549935000 -0.832492000 -2.221987000

H 5.387260000 0.174723000 -1.822501000

H 6.198391000 -1.395754000 -1.541723000

H 6.027339000 -0.760452000 -3.197375000

H 1.152290000 -2.898775000 2.709176000

C -4.468594000 -0.772775000 -0.457127000

C -2.531123000 -1.252526000 -1.772053000

H -5.007624000 -0.822291000 0.480220000

H -1.546479000 -1.679033000 -1.925350000

C -5.029155000 -0.196621000 -1.592181000

C -3.186182000 -0.659824000 -2.850091000

H -2.701879000 -0.613193000 -3.821509000

H -6.025937000 0.232796000 -1.551499000

N -4.409675000 -0.130929000 -2.776485000

H 4.688298000 -0.849430000 0.189268000

C -2.335288000 0.867264000 1.695431000

O -3.034057000 0.369756000 2.548916000

N -0.294264000 0.431865000 2.843850000

N -0.951548000 0.896331000 1.741971000

H -0.456057000 1.486062000 1.082300000

C -2.920638000 1.512143000 0.461815000

C 0.986921000 0.499970000 2.863577000

C 1.925737000 0.967655000 1.822337000

C 3.044937000 1.718046000 2.196895000

C 1.780227000 0.641577000 0.459604000

H 0.962034000 0.005700000 0.141965000

H 3.194165000 1.961585000 3.243528000

C 2.696791000 1.076944000 -0.481174000

C 3.969144000 2.171990000 1.259914000

H 2.597554000 0.817084000 -1.527846000

C 3.794564000 1.857591000 -0.092214000

O 4.625995000 2.242806000 -1.092805000

C 5.767082000 3.031173000 -0.769199000

H 5.478253000 3.985767000 -0.315479000

H 6.445208000 2.495908000 -0.095290000

H 6.273203000 3.219863000 -1.714041000

H 1.425440000 0.176203000 3.805127000

C -4.260926000 1.896889000 0.512076000

C -2.230178000 1.717756000 -0.735705000

H -4.829167000 1.726513000 1.417449000

H -1.199107000 1.410629000 -0.867978000

C -4.834555000 2.485164000 -0.610159000

C -2.901809000 2.308453000 -1.804608000

H -2.386202000 2.472409000 -2.746757000

H -5.873388000 2.801503000 -0.590548000

N -4.178086000 2.696934000 -1.756828000

H 4.814503000 2.758718000 1.591990000

**Table S18:** B3LYP-D/6-311G(d,p) optimized geometrical coordinates of dimer of INH1. The structure is global minima (absence of negative frequency).

**Electronic Energy = -1791.052514 Hartree**

C -2.756792000 2.224599000 0.611827000

O -3.458385000 2.611618000 1.518654000

N -0.711368000 2.731948000 1.720495000

N -1.372864000 2.206385000 0.648817000

H -0.865615000 2.047822000 -0.215258000

C -3.340431000 1.699382000 -0.677865000

C 0.571662000 2.738267000 1.702160000

C 1.511253000 2.205038000 0.693879000

C 2.676457000 2.935390000 0.401398000

C 1.331962000 0.973214000 0.054827000

H 0.481899000 0.348984000 0.304069000

H 2.841149000 3.882641000 0.905694000

C 2.268541000 0.500423000 -0.862237000

C 3.620480000 2.497951000 -0.515601000

H 2.110640000 -0.462665000 -1.327841000

C 3.401914000 1.260301000 -1.157368000

O 4.366036000 0.891741000 -2.043128000

C 4.234540000 -0.349698000 -2.726698000

H 4.225903000 -1.192592000 -2.026782000

H 3.326740000 -0.373880000 -3.339856000

H 5.107598000 -0.426030000 -3.372204000

H 1.015223000 3.237483000 2.561186000

C -4.647924000 2.070691000 -0.992620000

C -2.680235000 0.836632000 -1.556770000

H -5.194643000 2.716133000 -0.317211000

H -1.678379000 0.472291000 -1.360898000

C -5.218336000 1.592859000 -2.167795000

C -3.346897000 0.407469000 -2.702879000

H -2.855907000 -0.269585000 -3.396495000

H -6.230938000 1.877225000 -2.438702000

N -4.590110000 0.775334000 -3.020986000

C 4.857818000 3.291185000 -0.838064000

H 5.759157000 2.710197000 -0.623904000

H 4.894156000 3.538912000 -1.902653000

H 4.892315000 4.217236000 -0.262329000

C -2.656021000 -1.374686000 1.965595000

O -3.353346000 -1.131797000 2.924289000

N -0.606262000 -1.000763000 3.118409000

N -1.271664000 -1.377436000 1.988079000

H -0.771300000 -1.403244000 1.106014000

C -3.245840000 -1.718682000 0.618906000

C 0.676306000 -0.972822000 3.090491000

C 1.612520000 -1.342357000 2.008482000

C 2.764653000 -0.560452000 1.813870000

C 1.443282000 -2.472657000 1.201200000

H 0.604363000 -3.138676000 1.365588000

H 2.921743000 0.307287000 2.447175000

C 2.376613000 -2.795471000 0.218142000

C 3.704949000 -0.848179000 0.835874000

H 2.226927000 -3.684313000 -0.379195000

C 3.496493000 -1.984440000 0.025399000

O 4.456277000 -2.208174000 -0.911988000

C 4.334497000 -3.340911000 -1.765102000

H 4.344506000 -4.275270000 -1.192999000

H 3.420801000 -3.290645000 -2.367831000

H 5.201771000 -3.311165000 -2.422130000

H 1.121957000 -0.595049000 4.008407000

C -4.561424000 -1.325647000 0.371433000

C -2.583187000 -2.436968000 -0.379907000

H -5.109789000 -0.791625000 1.136803000

H -1.574522000 -2.810648000 -0.246548000

C -5.137472000 -1.638932000 -0.855249000

C -3.255828000 -2.707675000 -1.570057000

H -2.762946000 -3.271206000 -2.357506000

H -6.156578000 -1.333825000 -1.074226000

N -4.507129000 -2.316614000 -1.821874000

C 4.928045000 0.001314000 0.619991000

H 5.839324000 -0.590870000 0.741274000

H 4.949998000 0.399252000 -0.398440000

H 4.955986000 0.835921000 1.322046000

**Table S19:** B3LYP-D/6-311G(d,p) optimized geometrical coordinates of dimer of INH2. The structure is global minima (absence of negative frequency).

**Electronic Energy = -2174.422884 Hartree**

C 3.698389000 1.208503000 -1.419467000

O 4.374950000 0.645084000 -2.248929000

N 1.684334000 0.095660000 -2.032693000

N 2.349312000 0.962280000 -1.218008000

H 1.820276000 1.599891000 -0.632931000

C 4.274851000 2.251675000 -0.493235000

C 0.430119000 -0.089130000 -1.838948000

C -0.456103000 0.469947000 -0.792924000

C -1.739706000 0.896402000 -1.152364000

C -0.076766000 0.555080000 0.555539000

H 0.889044000 0.181323000 0.874567000

H -2.038298000 0.842070000 -2.193787000

C -0.960171000 1.068371000 1.496526000

C -2.640736000 1.431629000 -0.226073000

H -0.691602000 1.129202000 2.544343000

C -2.225403000 1.513510000 1.118132000

O -3.034329000 2.047817000 2.092259000

C -4.095375000 1.191840000 2.539816000

H -4.777040000 0.940085000 1.722043000

H -3.688598000 0.272783000 2.976176000

H -4.635822000 1.750525000 3.302783000

H -0.035016000 -0.741703000 -2.574459000

C 5.469869000 2.862257000 -0.875523000

C 3.720871000 2.619173000 0.736013000

H 5.936742000 2.579071000 -1.810115000

H 2.816618000 2.162343000 1.121403000

C 6.035138000 3.817248000 -0.037078000

C 4.373322000 3.581323000 1.504847000

H 3.964328000 3.877653000 2.466728000

H 6.959689000 4.312880000 -0.318379000

N 5.506343000 4.183364000 1.136397000

C -3.979212000 1.897541000 -0.671559000

C -4.747719000 1.110146000 -1.539895000

C -4.492883000 3.133664000 -0.253763000

C -5.994811000 1.544639000 -1.980731000

H -4.372263000 0.142943000 -1.855313000

C -5.737495000 3.567652000 -0.698486000

H -3.913440000 3.746533000 0.423937000

C -6.493628000 2.776035000 -1.561948000

H -6.577729000 0.918834000 -2.647034000

H -6.117178000 4.529233000 -0.371674000

H -7.464348000 3.116169000 -1.904178000

C 4.089848000 -2.366614000 -1.031518000

O 4.727720000 -2.796214000 -1.965193000

N 2.014641000 -3.244238000 -1.802347000

N 2.731985000 -2.580070000 -0.853013000

H 2.242749000 -2.038904000 -0.148363000

C 4.729094000 -1.545937000 0.062225000

C 0.754609000 -3.400622000 -1.621786000

C -0.090619000 -3.005795000 -0.472079000

C -1.354062000 -2.457028000 -0.719594000

C 0.306530000 -3.194704000 0.860619000

H 1.254936000 -3.668626000 1.084645000

H -1.665811000 -2.299659000 -1.746589000

C -0.539340000 -2.825153000 1.898531000

C -2.216549000 -2.062332000 0.308350000

H -0.257169000 -2.975882000 2.933621000

C -1.783666000 -2.255390000 1.635540000

O -2.553731000 -1.875106000 2.708458000

C -3.652998000 -2.747088000 3.008598000

H -4.355197000 -2.806738000 2.171844000

H -3.289870000 -3.750638000 3.256729000

H -4.155877000 -2.316273000 3.873375000

H 0.248732000 -3.879512000 -2.457209000

C 5.950112000 -0.933503000 -0.222490000

C 4.207618000 -1.389776000 1.349344000

H 6.392013000 -1.058173000 -1.202697000

H 3.284952000 -1.866201000 1.660150000

C 6.572707000 -0.182247000 0.768731000

C 4.916924000 -0.622658000 2.271810000

H 4.533784000 -0.493064000 3.280132000

H 7.518726000 0.311650000 0.567018000

N 6.075732000 -0.018174000 2.000317000

C -3.533635000 -1.455979000 -0.015178000

C -4.350814000 -2.027271000 -1.000290000

C -3.978263000 -0.296992000 0.637099000

C -5.578223000 -1.457082000 -1.326960000

H -4.029225000 -2.934986000 -1.498858000

C -5.203261000 0.273312000 0.306469000

H -3.360891000 0.148245000 1.406031000

C -6.008252000 -0.303644000 -0.674894000

H -6.199617000 -1.916982000 -2.087055000

H -5.529245000 1.173575000 0.815256000

H -6.963542000 0.141906000 -0.927913000

**Table S20:** B3LYP-D/6-311G(d,p) optimized geometrical coordinates of dimer of INH3. The structure is global minima (absence of negative frequency).

**Electronic Energy = -2815.828768 Hartree**

C 3.878498000 1.211826000 -1.482260000

O 4.500053000 0.917440000 -2.477141000

N 1.763397000 0.612070000 -2.397791000

N 2.508148000 1.051751000 -1.345020000

H 2.043834000 1.488146000 -0.555755000

C 4.551459000 1.787819000 -0.260366000

C 0.493867000 0.510019000 -2.250076000

C -0.334007000 0.754295000 -1.045854000

C -1.536362000 1.453980000 -1.182961000

C 0.026607000 0.280214000 0.224693000

H 0.928868000 -0.306268000 0.351857000

H -1.809242000 1.834184000 -2.161344000

C -0.801306000 0.517171000 1.314735000

C -2.381121000 1.718155000 -0.096215000

H -0.548525000 0.149175000 2.301912000

C -1.988354000 1.230720000 1.169579000

O -2.744699000 1.458359000 2.293506000

C -3.874498000 0.584348000 2.442169000

H -4.566910000 0.686773000 1.601379000

H -3.544988000 -0.456973000 2.525340000

H -4.373463000 0.884302000 3.362742000

H -0.032842000 0.218026000 -3.155723000

C 5.802981000 2.380009000 -0.433023000

C 4.029363000 1.735020000 1.034827000

H 6.244954000 2.411821000 -1.420594000

H 3.082337000 1.256169000 1.255688000

C 6.454418000 2.909755000 0.675864000

C 4.769156000 2.287511000 2.078854000

H 4.386285000 2.252076000 3.094950000

H 7.424491000 3.385221000 0.564324000

N 5.957572000 2.873751000 1.917875000

C -3.619743000 2.487116000 -0.271282000

C -4.206175000 3.383660000 0.589138000

S -4.568816000 2.347096000 -1.739596000

C -5.396762000 3.967029000 0.075734000

H -3.784104000 3.609452000 1.557265000

C -5.719561000 3.507452000 -1.169114000

H -5.986180000 4.701003000 0.608840000

H -6.564256000 3.773907000 -1.785794000

C 3.836024000 -2.146253000 -1.166970000

O 4.478465000 -2.521174000 -2.120640000

N 1.782512000 -3.061791000 -1.952102000

N 2.487101000 -2.410124000 -0.985052000

H 1.987185000 -1.910134000 -0.257686000

C 4.457084000 -1.342726000 -0.050593000

C 0.528601000 -3.257740000 -1.769753000

C -0.313780000 -2.921289000 -0.598261000

C -1.576637000 -2.361534000 -0.812456000

C 0.094359000 -3.174355000 0.720248000

H 1.047841000 -3.651484000 0.913708000

H -1.887544000 -2.151299000 -1.829998000

C -0.747819000 -2.861394000 1.779763000

C -2.438137000 -2.023763000 0.240232000

H -0.458027000 -3.060187000 2.804624000

C -1.996760000 -2.287719000 1.555377000

O -2.766683000 -1.972549000 2.648526000

C -3.809516000 -2.916340000 2.938696000

H -4.511704000 -2.998730000 2.103832000

H -3.384062000 -3.900524000 3.162784000

H -4.330706000 -2.535280000 3.815935000

H 0.027906000 -3.722890000 -2.615814000

C 5.647285000 -0.668935000 -0.326701000

C 3.947190000 -1.258044000 1.247765000

H 6.080550000 -0.737804000 -1.316240000

H 3.049779000 -1.785340000 1.550337000

C 6.250788000 0.070934000 0.684738000

C 4.636294000 -0.496900000 2.190277000

H 4.262320000 -0.422116000 3.207552000

H 7.171883000 0.612588000 0.490456000

N 5.764263000 0.166903000 1.927649000

C -3.743707000 -1.404471000 -0.020723000

C -4.407823000 -0.452045000 0.714025000

S -4.681262000 -1.838775000 -1.437995000

C -5.649575000 -0.059476000 0.143639000

H -4.004898000 -0.052830000 1.633086000

C -5.932939000 -0.719430000 -1.017921000

H -6.302776000 0.685806000 0.577480000

H -6.801169000 -0.622188000 -1.651580000

**Table S21:** B3LYP-D/6-311G(d,p) optimized geometrical coordinates of dimer of INH4. The structure is global minima (absence of negative frequency).

**Electronic Energy = -2508.795801 Hartree**

C -3.240446000 -0.308248000 -1.208243000

O -3.881408000 0.608725000 -1.668144000

N -1.127291000 0.644584000 -1.752911000

N -1.855775000 -0.350365000 -1.171100000

H -1.401991000 -1.229264000 -0.945905000

C -3.904582000 -1.521294000 -0.603192000

C 0.152177000 0.556630000 -1.736867000

C 1.022419000 -0.467901000 -1.119288000

C 2.167030000 -0.884553000 -1.813115000

C 0.791238000 -0.996862000 0.156311000

H -0.044283000 -0.645700000 0.749520000

H 2.372970000 -0.462785000 -2.791378000

C 1.664291000 -1.931887000 0.706004000

C 3.041009000 -1.828841000 -1.286952000

H 1.471004000 -2.311977000 1.699694000

C 2.782583000 -2.366293000 -0.006724000

O 3.674940000 -3.283701000 0.453198000

C 3.481281000 -3.854309000 1.744355000

H 2.532404000 -4.398286000 1.798974000

H 4.305614000 -4.550661000 1.885200000

H 3.513953000 -3.088371000 2.526358000

H 0.652096000 1.355456000 -2.280281000

C -5.224638000 -1.784777000 -0.969942000

C -3.305786000 -2.373461000 0.328457000

H -5.724276000 -1.126613000 -1.669117000

H -2.297843000 -2.210652000 0.692261000

C -5.868265000 -2.887504000 -0.417959000

C -4.043195000 -3.445138000 0.828192000

H -3.600884000 -4.116344000 1.559210000

H -6.892331000 -3.118488000 -0.696293000

N -5.299448000 -3.715203000 0.466505000

S 4.449587000 -2.323432000 -2.261065000

H 5.005458000 -3.110277000 -1.321873000

C -2.558860000 3.131692000 0.139829000

O -3.201079000 4.091835000 -0.219143000

N -0.446668000 4.174054000 -0.209598000

N -1.175440000 3.103122000 0.215975000

H -0.713807000 2.208513000 0.341139000

C -3.220317000 1.842340000 0.562546000

C 0.833034000 4.101383000 -0.163642000

C 1.701437000 3.017265000 0.345236000

C 2.873517000 2.708279000 -0.358953000

C 1.440664000 2.325560000 1.534327000

H 0.581656000 2.586571000 2.140369000

H 3.101860000 3.255093000 -1.267883000

C 2.312413000 1.338971000 1.987485000

C 3.747064000 1.715546000 0.069723000

H 2.095537000 0.831663000 2.917459000

C 3.459067000 1.014470000 1.261433000

O 4.352535000 0.057157000 1.628491000

C 4.129498000 -0.677362000 2.828875000

H 3.188798000 -1.236115000 2.782600000

H 4.960909000 -1.375291000 2.905809000

H 4.125362000 -0.018092000 3.703290000

H 1.335553000 4.969930000 -0.583690000

C -4.523949000 1.611141000 0.122585000

C -2.635668000 0.885188000 1.396071000

H -5.013257000 2.347284000 -0.502185000

H -1.642156000 1.012886000 1.810119000

C -5.165175000 0.438278000 0.507510000

C -3.369561000 -0.251378000 1.730161000

H -2.938290000 -1.005295000 2.382969000

H -6.176236000 0.231767000 0.168917000

N -4.609471000 -0.488926000 1.296434000

S 5.192790000 1.368779000 -0.913760000

H 5.733199000 0.474873000 -0.065768000

**Table S22:** B3LYP-D/6-311G(d,p) optimized geometrical coordinates of dimer of INH5. The structure is global minima (absence of negative frequency).

**Electronic Energy = -1910.928963 Hartree**

C -2.711719000 -1.901371000 1.465228000

O -3.395765000 -1.912580000 2.462508000

N -0.651127000 -1.861504000 2.656060000

N -1.325011000 -1.922524000 1.473366000

H -0.832124000 -1.722477000 0.609832000

C -3.315883000 -1.872666000 0.082358000

C 0.631404000 -1.846040000 2.634570000

C 1.560420000 -1.943145000 1.489471000

C 2.727278000 -1.171215000 1.499287000

C 1.367928000 -2.823472000 0.410225000

H 0.513307000 -3.488752000 0.398365000

H 2.947306000 -0.494216000 2.316510000

C 2.288305000 -2.892633000 -0.623043000

C 3.638742000 -1.247972000 0.462540000

H 2.150670000 -3.575176000 -1.452562000

C 3.443642000 -2.098920000 -0.635778000

O 4.264183000 -2.265783000 -1.696863000

C 5.339595000 -1.351440000 -1.958889000

H 4.980068000 -0.320580000 -1.997035000

H 6.124871000 -1.436057000 -1.206543000

H 5.725227000 -1.644372000 -2.933692000

H 1.083297000 -1.725910000 3.616686000

C -4.635031000 -1.433162000 -0.034163000

C -2.664106000 -2.289334000 -1.081463000

H -5.174671000 -1.128762000 0.853378000

H -1.653573000 -2.681198000 -1.068303000

C -5.225534000 -1.404663000 -1.293187000

C -3.350521000 -2.228907000 -2.292975000

H -2.865874000 -2.553926000 -3.209381000

H -6.247827000 -1.056953000 -1.409541000

N -4.605513000 -1.790537000 -2.414462000

F 4.751595000 -0.474502000 0.544191000

C -2.786576000 1.974084000 1.190429000

O -3.473421000 2.076714000 2.180541000

N -0.730481000 2.000692000 2.389376000

N -1.402893000 1.881878000 1.210243000

H -0.897516000 1.987656000 0.337287000

C -3.384051000 1.925257000 -0.194781000

C 0.551171000 1.948005000 2.376031000

C 1.477466000 1.713244000 1.248815000

C 2.682974000 2.422115000 1.206596000

C 1.242713000 0.761970000 0.240465000

H 0.354585000 0.142951000 0.274556000

H 2.935445000 3.148946000 1.969858000

C 2.161485000 0.564264000 -0.777517000

C 3.592461000 2.217035000 0.185675000

H 1.991045000 -0.173317000 -1.552006000

C 3.356696000 1.293645000 -0.844008000

O 4.170759000 1.001654000 -1.882792000

C 5.293235000 1.835674000 -2.207828000

H 4.988106000 2.877574000 -2.329197000

H 6.070647000 1.769910000 -1.445497000

H 5.666134000 1.447469000 -3.153875000

H 1.005613000 2.121394000 3.348970000

C -4.678096000 2.421942000 -0.354920000

C -2.751230000 1.385231000 -1.317643000

H -5.203917000 2.822679000 0.502122000

H -1.762567000 0.943828000 -1.266512000

C -5.262329000 2.381935000 -1.616553000

C -3.429729000 1.385710000 -2.535106000

H -2.959809000 0.965023000 -3.419707000

H -6.264715000 2.771879000 -1.767184000

N -4.659749000 1.877554000 -2.699641000

F 4.743891000 2.935881000 0.214556000

**Table S23:** B3LYP-D/6-311G(d,p) optimized geometrical coordinates of dimer of INH6. The structure is global minima (absence of negative frequency).

**Electronic Energy = -2631.658183 Hartree**

C 3.521073000 1.333452000 -1.371808000

O 4.200808000 1.256883000 -2.368427000

N 1.459816000 1.388784000 -2.560535000

N 2.133022000 1.361383000 -1.377857000

H 1.649429000 1.613784000 -0.522683000

C 4.127752000 1.401377000 0.007977000

C 0.180247000 1.464217000 -2.541736000

C -0.741725000 1.476094000 -1.382171000

C -1.829384000 2.357664000 -1.396090000

C -0.604124000 0.595485000 -0.297828000

H 0.191045000 -0.140495000 -0.295905000

H -1.977162000 3.027364000 -2.234516000

C -1.511547000 0.625900000 0.753120000

C -2.728560000 2.387876000 -0.338442000

H -1.430563000 -0.062443000 1.585789000

C -2.579888000 1.523856000 0.756949000

O -3.477718000 1.493042000 1.782358000

C -3.290651000 2.498571000 2.791423000

H -2.319336000 2.374241000 3.282772000

H -3.363031000 3.504802000 2.369162000

H -4.089376000 2.350499000 3.516208000

H -0.271983000 1.546964000 -3.527210000

C 5.456010000 1.816829000 0.107262000

C 3.467966000 1.041940000 1.186251000

H 6.001395000 2.075995000 -0.791046000

H 2.449972000 0.669530000 1.186195000

C 6.047841000 1.880385000 1.364474000

C 4.156683000 1.132897000 2.394555000

H 3.666830000 0.851792000 3.322656000

H 7.077136000 2.210952000 1.467955000

N 5.420474000 1.549677000 2.499175000

Cl -4.088831000 3.491432000 -0.399994000

C 2.354831000 -1.950123000 -1.371808000

O 3.038118000 -1.982071000 -2.368427000

N 0.294367000 -2.029722000 -2.560535000

N 0.967925000 -2.013034000 -1.377857000

H 0.468859000 -1.792803000 -0.522683000

C 2.955768000 -1.842665000 0.007977000

C -0.987395000 -2.038139000 -2.541736000

C -1.908170000 -2.086587000 -1.382171000

C -3.051158000 -1.278040000 -1.396091000

C -1.713269000 -2.956311000 -0.297829000

H -0.871667000 -3.638708000 -0.295906000

H -3.242420000 -0.619439000 -2.234517000

C -2.620738000 -2.985309000 0.753119000

C -3.950384000 -1.306702000 -0.338443000

H -2.494908000 -3.666882000 1.585788000

C -3.745521000 -2.159148000 0.756949000

O -4.639414000 -2.248618000 1.782358000

C -4.518511000 -1.233007000 2.791422000

H -3.541145000 -1.293543000 3.282771000

H -4.656548000 -0.233664000 2.369161000

H -5.305842000 -1.433001000 3.516207000

H -1.444069000 -1.985146000 -3.527210000

C 4.254010000 -1.341230000 0.107262000

C 2.320903000 -2.244484000 1.186251000

H 4.781277000 -1.046949000 -0.791046000

H 1.329445000 -2.682677000 1.186194000

C 4.840417000 -1.239102000 1.364474000

C 3.002196000 -2.108677000 2.394555000

H 2.531777000 -2.421218000 3.322656000

H 5.845888000 -0.841924000 1.467955000

N 4.236022000 -1.610135000 2.499175000

Cl -5.379919000 -0.294474000 -0.399995000

**Table S24:** B3LYP-D/6-311G(d,p) optimized geometrical coordinates of dimer of INH7. The structure is global minima (absence of negative frequency).

**Electronic Energy = -6859.460238 Hartree**

C -3.520150000 2.090997000 -1.268819000

O -4.190548000 2.226445000 -2.265588000

N -1.460449000 2.551192000 -2.369838000

N -2.145592000 2.279255000 -1.225365000

H -1.638524000 1.969193000 -0.403444000

C -4.126426000 1.701294000 0.056799000

C -0.185847000 2.673351000 -2.310433000

C 0.705716000 2.615752000 -1.128012000

C 1.911389000 1.909974000 -1.226491000

C 0.416739000 3.291917000 0.067566000

H -0.480434000 3.894688000 0.144792000

H 2.166591000 1.402131000 -2.148481000

C 1.299322000 3.235887000 1.138222000

C 2.784011000 1.848649000 -0.146967000

H 1.101424000 3.774664000 2.057257000

C 2.489943000 2.511550000 1.053122000

O 3.356373000 2.516808000 2.106531000

C 3.214474000 1.414309000 3.016017000

H 2.219744000 1.417498000 3.475431000

H 3.382676000 0.459532000 2.508892000

H 3.973024000 1.556459000 3.783923000

H 0.289995000 2.824298000 -3.276480000

C -5.376353000 1.081581000 0.034995000

C -3.544818000 1.950469000 1.302788000

H -5.863854000 0.899433000 -0.914073000

H -2.596151000 2.465082000 1.403828000

C -5.967736000 0.719261000 1.240771000

C -4.226778000 1.554773000 2.452055000

H -3.797625000 1.744389000 3.431965000

H -6.935480000 0.226464000 1.248579000

N -5.413164000 0.943094000 2.437795000

Br 4.423134000 0.879590000 -0.319554000

C -3.425451000 -1.782892000 -1.494376000

O -4.094310000 -1.765451000 -2.501178000

N -1.378232000 -1.344997000 -2.627307000

N -2.059514000 -1.537801000 -1.464608000

H -1.545998000 -1.751364000 -0.616372000

C -4.024505000 -2.073238000 -0.140295000

C -0.109715000 -1.168131000 -2.575873000

C 0.775957000 -1.082486000 -1.390727000

C 2.008650000 -1.746583000 -1.420888000

C 0.453501000 -0.311711000 -0.262879000

H -0.466807000 0.260020000 -0.243612000

H 2.289119000 -2.326187000 -2.291803000

C 1.330842000 -0.235071000 0.810805000

C 2.876187000 -1.674790000 -0.337915000

H 1.106455000 0.377287000 1.676101000

C 2.549130000 -0.917001000 0.795626000

O 3.408065000 -0.781585000 1.846478000

C 3.303249000 -1.801053000 2.852711000

H 2.306272000 -1.794821000 3.307197000

H 3.511482000 -2.790865000 2.435604000

H 4.050881000 -1.559739000 3.606432000

H 0.365990000 -1.087600000 -3.550388000

C -5.249335000 -2.740790000 -0.108657000

C -3.460829000 -1.688659000 1.079219000

H -5.723441000 -3.027854000 -1.038380000

H -2.533455000 -1.130235000 1.135289000

C -5.833815000 -3.014258000 1.123619000

C -4.134168000 -2.004047000 2.258033000

H -3.718850000 -1.709017000 3.217626000

H -6.781781000 -3.541773000 1.173889000

N -5.295865000 -2.660429000 2.296620000

Br 4.552658000 -2.590673000 -0.416585000

**Table S25:** B3LYP-D/6-311G(d,p) optimized geometrical coordinates of dimer of INH8. The structure is global minima (absence of negative frequency).

**Electronic Energy = -2121.151266 Hartree**

C -3.164394000 2.009999000 1.169270000

O -3.826338000 2.124913000 2.173558000

N -1.089208000 1.958195000 2.332889000

N -1.781000000 1.871220000 1.163714000

H -1.289709000 1.984181000 0.283455000

C -3.786123000 1.994085000 -0.204526000

C 0.188806000 1.862940000 2.305800000

C 1.087981000 1.597250000 1.160475000

C 2.290383000 2.292061000 1.063144000

C 0.811703000 0.624540000 0.179028000

H -0.088690000 0.026207000 0.252973000

H 2.558463000 3.044413000 1.794190000

C 1.707250000 0.365962000 -0.841301000

C 3.167317000 2.067658000 0.003848000

H 1.522637000 -0.416675000 -1.566372000

C 2.915376000 1.072598000 -0.959808000

O 3.710486000 0.688847000 -1.973910000

C 5.143620000 0.685523000 -1.849889000

H 5.566725000 1.598940000 -2.264093000

H 5.443460000 0.579745000 -0.803178000

H 5.483408000 -0.181461000 -2.414865000

H 0.663576000 2.012796000 3.272498000

C -5.057641000 2.551676000 -0.343008000

C -3.196810000 1.425950000 -1.337064000

H -5.550889000 2.976163000 0.521930000

H -2.230248000 0.936811000 -1.300356000

C -5.662890000 2.540146000 -1.595414000

C -3.893771000 1.459065000 -2.543568000

H -3.458801000 1.017429000 -3.435710000

H -6.647963000 2.976915000 -1.730395000

N -5.101635000 2.008483000 -2.687588000

N 4.309675000 2.992165000 -0.094578000

O 4.610535000 3.388829000 -1.213761000

O 4.848883000 3.343404000 0.945484000

C -3.248346000 -1.873602000 1.502277000

O -3.911992000 -1.859831000 2.511908000

N -1.172913000 -2.004024000 2.659280000

N -1.863219000 -1.992890000 1.486052000

H -1.373286000 -1.793373000 0.620521000

C -3.869501000 -1.772065000 0.131885000

C 0.106266000 -2.079405000 2.625439000

C 1.009168000 -2.227254000 1.461917000

C 2.202195000 -1.510531000 1.430271000

C 0.746138000 -3.109710000 0.395231000

H -0.146191000 -3.724214000 0.412848000

H 2.460030000 -0.824697000 2.227441000

C 1.645290000 -3.261957000 -0.643174000

C 3.082287000 -1.625434000 0.356160000

H 1.471318000 -3.977384000 -1.437044000

C 2.843887000 -2.531448000 -0.694818000

O 3.644283000 -2.810237000 -1.738615000

C 5.077305000 -2.805840000 -1.613347000

H 5.488253000 -1.852825000 -1.941673000

H 5.378300000 -3.002911000 -0.580263000

H 5.428780000 -3.612924000 -2.254748000

H 0.578775000 -2.012293000 3.602475000

C -5.148328000 -1.221097000 0.043137000

C -3.272393000 -2.226353000 -1.047010000

H -5.647400000 -0.884090000 0.942557000

H -2.299386000 -2.703908000 -1.053791000

C -5.753091000 -1.126078000 -1.205949000

C -3.969464000 -2.092298000 -2.246436000

H -3.528431000 -2.444666000 -3.174597000

H -6.743885000 -0.691927000 -1.301845000

N -5.184534000 -1.548115000 -2.341354000

N 4.212206000 -0.680697000 0.344342000

O 4.507985000 -0.179371000 -0.733441000

O 4.746437000 -0.418917000 1.412944000

**Table S26:** B3LYP-D/6-311G(d,p) optimized geometrical coordinates of dimer of INH9. The structure is global minima (absence of negative frequency).

**Electronic Energy = -1938.674082 Hartree**

C 2.644157000 1.076124000 2.343826000

O 3.272796000 0.781149000 3.333504000

N 0.534578000 0.500215000 3.286285000

N 1.260984000 1.014352000 2.252401000

H 0.835857000 1.083316000 1.333930000

C 3.317852000 1.565144000 1.085219000

C -0.739155000 0.421846000 3.161868000

C -1.610516000 0.869807000 2.052820000

C -2.695432000 0.078152000 1.670490000

C -1.441106000 2.102559000 1.399987000

H -0.648428000 2.772079000 1.713664000

H -2.890670000 -0.870216000 2.159745000

C -2.297761000 2.513535000 0.385606000

C -3.564891000 0.459821000 0.650741000

H -2.138687000 3.475630000 -0.080821000

C -3.361949000 1.692514000 -0.008407000

O -4.237748000 2.004873000 -0.991344000

C -4.094999000 3.241646000 -1.687903000

H -4.900419000 3.260118000 -2.419076000

H -4.199807000 4.094016000 -1.008782000

H -3.131732000 3.296024000 -2.205666000

H -1.233224000 -0.064193000 3.999947000

C 4.665043000 1.248068000 0.908954000

C 2.699540000 2.347274000 0.106065000

H 5.178566000 0.666825000 1.664008000

H 1.668341000 2.669283000 0.194124000

C 5.316630000 1.696983000 -0.235134000

C 3.446618000 2.754031000 -0.997776000

H 2.989583000 3.369271000 -1.767935000

H 6.362259000 1.453941000 -0.399519000

N 4.729857000 2.436965000 -1.183280000

C -4.692807000 -0.439031000 0.291266000

O -4.897805000 -1.498859000 0.840991000

H -5.348407000 -0.080159000 -0.520782000

C 3.025226000 -2.088342000 0.287171000

O 3.699159000 -2.558656000 1.173895000

N 0.963099000 -2.402428000 1.435737000

N 1.649111000 -1.924985000 0.357612000

H 1.145063000 -1.714852000 -0.497291000

C 3.631286000 -1.608847000 -1.008928000

C -0.311999000 -2.269827000 1.459374000

C -1.211478000 -1.601092000 0.493114000

C -2.446838000 -2.178840000 0.193066000

C -0.912077000 -0.360538000 -0.095064000

H 0.009239000 0.148427000 0.164007000

H -2.742202000 -3.121975000 0.640443000

C -1.793077000 0.261693000 -0.971647000

C -3.345803000 -1.583006000 -0.689183000

H -1.528453000 1.222121000 -1.391215000

C -3.014214000 -0.347242000 -1.287623000

O -3.926878000 0.178336000 -2.137075000

C -3.657648000 1.430626000 -2.765141000

H -4.522768000 1.635188000 -3.392339000

H -3.546846000 2.230002000 -2.025246000

H -2.759852000 1.375946000 -3.389554000

H -0.786608000 -2.739870000 2.317582000

C 4.880871000 -2.117382000 -1.364538000

C 3.048988000 -0.661551000 -1.855296000

H 5.369513000 -2.832088000 -0.714860000

H 2.100554000 -0.190381000 -1.624455000

C 5.470934000 -1.683334000 -2.547101000

C 3.730039000 -0.287265000 -3.012069000

H 3.300766000 0.453298000 -3.681275000

H 6.438349000 -2.072754000 -2.850235000

N 4.915933000 -0.785013000 -3.369204000

C -4.638554000 -2.261408000 -0.968316000

O -4.955385000 -3.317698000 -0.466991000

H -5.309304000 -1.738617000 -1.671741000

**Table S27:** B3LYP-D/6-311G(d,p) optimized geometrical coordinates of dimer of INH10. The structure is global minima (absence of negative frequency).

**Electronic Energy = -2089.567943 Hartree**

C 2.774263000 -1.573934000 1.268249000

O 3.433804000 -1.551384000 2.281493000

N 0.686850000 -1.449407000 2.407042000

N 1.390232000 -1.479233000 1.239589000

H 0.908831000 -1.701006000 0.374800000

C 3.407238000 -1.698786000 -0.095747000

C -0.593031000 -1.394002000 2.351286000

C -1.481097000 -1.292638000 1.171934000

C -2.656802000 -2.038232000 1.138467000

C -1.217420000 -0.432289000 0.088996000

H -0.339252000 0.202902000 0.103542000

H -2.881440000 -2.711702000 1.955503000

C -2.105548000 -0.332516000 -0.964577000

C -3.549635000 -1.991123000 0.056119000

H -1.935527000 0.360593000 -1.778887000

C -3.285512000 -1.092029000 -1.003446000

O -4.062626000 -0.862337000 -2.082158000

C -5.492514000 -0.772867000 -1.972877000

H -5.955572000 -1.713237000 -2.263098000

H -5.788453000 -0.517212000 -0.951095000

H -5.790769000 0.028548000 -2.649021000

H -1.077597000 -1.444687000 3.323646000

C 4.698830000 -2.222645000 -0.161255000

C 2.808729000 -1.291128000 -1.290911000

H 5.198754000 -2.522706000 0.750710000

H 1.824880000 -0.837139000 -1.317804000

C 5.314619000 -2.338406000 -1.403083000

C 3.517206000 -1.442624000 -2.481532000

H 3.074517000 -1.126589000 -3.421939000

H 6.315760000 -2.752279000 -1.480179000

N 4.745089000 -1.961199000 -2.553768000

C -4.640044000 -3.000070000 -0.001262000

O -5.158085000 -3.423423000 -1.007006000

O -4.977983000 -3.467981000 1.227415000

H -5.626184000 -4.172033000 1.080541000

C 3.629945000 1.369190000 1.385960000

O 4.314949000 1.343316000 2.382086000

N 1.628669000 1.914084000 2.555418000

N 2.280874000 1.693667000 1.378717000

H 1.742785000 1.502785000 0.540376000

C 4.190853000 1.054923000 0.020914000

C 0.374850000 2.180677000 2.521677000

C -0.519827000 2.356607000 1.356169000

C -1.803875000 1.819057000 1.395843000

C -0.149896000 3.091211000 0.213370000

H 0.821930000 3.569086000 0.168105000

H -2.112370000 1.245182000 2.260175000

C -1.041019000 3.273410000 -0.826556000

C -2.709305000 1.948450000 0.330807000

H -0.782991000 3.875973000 -1.688383000

C -2.331752000 2.722548000 -0.791260000

O -3.092579000 3.012294000 -1.867120000

C -4.483460000 3.347927000 -1.735492000

H -5.105588000 2.482773000 -1.953236000

H -4.700957000 3.712824000 -0.727263000

H -4.664599000 4.144497000 -2.457336000

H -0.081154000 2.272905000 3.504739000

C 5.374349000 0.317973000 -0.035401000

C 3.632131000 1.482420000 -1.186518000

H 5.845122000 -0.004686000 0.884330000

H 2.737417000 2.093058000 -1.223882000

C 5.923604000 0.023143000 -1.278834000

C 4.268352000 1.140009000 -2.378344000

H 3.855771000 1.466975000 -3.328653000

H 6.838841000 -0.557411000 -1.348222000

N 5.389735000 0.418569000 -2.440448000

C -3.953950000 1.135973000 0.362432000

O -4.566114000 0.744191000 -0.602387000

O -4.327125000 0.809003000 1.626006000

H -5.087880000 0.216424000 1.539249000

**Table S28:** B3LYP-D/6-311G(d,p) optimized geometrical coordinates of dimer of INH11. The structure is global minima (absence of negative frequency).

**Electronic Energy = -1941.523994 Hartree**

C 2.914688000 2.203813000 -1.041549000

O 3.563416000 2.504730000 -2.017463000

N 0.824749000 2.249427000 -2.181032000

N 1.541793000 2.018661000 -1.045837000

H 1.055312000 1.944238000 -0.158874000

C 3.556909000 1.988254000 0.307643000

C -0.450406000 2.117050000 -2.138289000

C -1.319741000 1.692805000 -1.018534000

C -2.539359000 2.365335000 -0.835292000

C -1.005391000 0.620191000 -0.176768000

H -0.105733000 0.039918000 -0.341576000

H -2.790357000 3.174739000 -1.508129000

C -1.879549000 0.259587000 0.846168000

C -3.417062000 2.005024000 0.183928000

H -1.663783000 -0.576010000 1.500934000

C -3.073585000 0.939942000 1.050015000

O -3.911463000 0.499797000 2.033609000

C -4.215198000 1.424246000 3.089397000

H -3.293664000 1.782831000 3.561740000

H -4.797141000 2.271223000 2.723383000

H -4.798185000 0.861062000 3.816953000

H -0.948469000 2.382660000 -3.068429000

C 4.818976000 2.545690000 0.515923000

C 2.997133000 1.239634000 1.346403000

H 5.289824000 3.108359000 -0.279891000

H 2.039077000 0.742370000 1.247817000

C 5.443692000 2.355450000 1.744024000

C 3.711752000 1.102714000 2.535087000

H 3.299086000 0.519417000 3.353513000

H 6.421897000 2.788165000 1.932427000

N 4.910559000 1.650064000 2.748480000

O -4.620838000 2.595990000 0.411196000

C -5.044929000 3.639554000 -0.459754000

H -6.027665000 3.940792000 -0.101848000

H -4.364581000 4.497437000 -0.418919000

H -5.128292000 3.286488000 -1.493331000

C 2.937925000 -1.639641000 -1.692616000

O 3.588299000 -1.437794000 -2.692656000

N 0.846190000 -1.671048000 -2.829281000

N 1.562740000 -1.806387000 -1.678493000

H 1.077335000 -1.792975000 -0.787927000

C 3.580337000 -1.739282000 -0.330041000

C -0.430474000 -1.782223000 -2.773256000

C -1.302710000 -2.090820000 -1.618462000

C -2.513091000 -1.388409000 -1.496234000

C -1.000395000 -3.085965000 -0.682418000

H -0.108709000 -3.690630000 -0.794392000

H -2.755091000 -0.640725000 -2.240041000

C -1.876847000 -3.339986000 0.370146000

C -3.393092000 -1.642432000 -0.447393000

H -1.670457000 -4.114942000 1.098392000

C -3.061500000 -2.628234000 0.512150000

O -3.902796000 -2.965531000 1.532777000

C -4.192141000 -1.944474000 2.499871000

H -3.264973000 -1.556303000 2.936448000

H -4.763877000 -1.126970000 2.058512000

H -4.780739000 -2.431048000 3.276522000

H -0.927146000 -1.596303000 -3.723270000

C 4.849990000 -1.181731000 -0.174974000

C 3.013245000 -2.382335000 0.773450000

H 5.326299000 -0.700444000 -1.019431000

H 2.048603000 -2.873923000 0.721790000

C 5.474954000 -1.267009000 1.064720000

C 3.728705000 -2.419305000 1.968919000

H 3.310358000 -2.919827000 2.837719000

H 6.459108000 -0.831741000 1.211705000

N 4.934986000 -1.870500000 2.130067000

O -4.588590000 -1.017416000 -0.273877000

C -5.001079000 -0.052427000 -1.236209000

H -5.979017000 0.293152000 -0.906327000

H -4.309576000 0.796597000 -1.274760000

H -5.091341000 -0.497437000 -2.233056000

**Table S29:** B3LYP-D/6-311G(d,p) optimized geometrical coordinates of dimer of INH12. The structure is global minima (absence of negative frequency).

**Electronic Energy = -1862.793046 Hartree**

C 1.507448000 3.033627000 -0.529053000

O 2.055462000 4.084892000 -0.286962000

N -0.679517000 3.838493000 -0.040483000

N 0.138263000 2.835659000 -0.470654000

H -0.220083000 1.887321000 -0.508700000

C 2.285116000 1.806220000 -0.939581000

C -1.938198000 3.607134000 0.046253000

C -2.704303000 2.390278000 -0.302407000

C -3.752084000 1.996299000 0.545635000

C -2.465095000 1.652172000 -1.467902000

H -1.709432000 1.975841000 -2.172834000

H -3.977611000 2.553555000 1.447280000

C -3.240777000 0.531337000 -1.773280000

C -4.517889000 0.879343000 0.257961000

H -3.050548000 -0.015034000 -2.687313000

C -4.257294000 0.135629000 -0.912756000

O -5.085882000 -0.939487000 -1.078686000

C -4.929838000 -1.748072000 -2.241169000

H -5.098573000 -1.164479000 -3.152382000

H -3.933861000 -2.202505000 -2.274021000

H -5.682955000 -2.530082000 -2.165858000

H -2.507219000 4.436307000 0.460954000

C 3.641491000 1.763903000 -0.615665000

C 1.753802000 0.730021000 -1.655249000

H 4.087678000 2.595237000 -0.085133000

H 0.718934000 0.707863000 -1.976913000

C 4.388420000 0.652402000 -0.991689000

C 2.592326000 -0.330942000 -1.992018000

H 2.202754000 -1.174822000 -2.554785000

H 5.443497000 0.592755000 -0.741006000

N 3.885980000 -0.387655000 -1.667517000

O -5.515918000 0.507671000 1.098883000

H -5.932069000 -0.282548000 0.729490000

C 3.548833000 0.202318000 1.109723000

O 4.190911000 1.174520000 1.436288000

N 1.447818000 1.146688000 1.712405000

N 2.168212000 0.120416000 1.176415000

H 1.726502000 -0.785259000 1.058724000

C 4.209518000 -1.045002000 0.573519000

C 0.174605000 1.019361000 1.802102000

C -0.700623000 -0.088085000 1.358527000

C -1.769647000 -0.465877000 2.187200000

C -0.541227000 -0.732842000 0.125936000

H 0.232219000 -0.412501000 -0.560999000

H -1.934491000 0.022818000 3.140281000

C -1.416961000 -1.748234000 -0.265572000

C -2.634999000 -1.479932000 1.813481000

H -1.286445000 -2.221892000 -1.229303000

C -2.454861000 -2.131638000 0.574761000

O -3.377642000 -3.110005000 0.327303000

C -3.307312000 -3.817664000 -0.907120000

H -3.433744000 -3.139435000 -1.757639000

H -2.356154000 -4.352525000 -1.000816000

H -4.126121000 -4.534337000 -0.889039000

H -0.313659000 1.853051000 2.301951000

C 5.560323000 -1.235810000 0.865723000

C 3.576502000 -1.999409000 -0.227154000

H 6.084677000 -0.499616000 1.461320000

H 2.540196000 -1.900908000 -0.529279000

C 6.201097000 -2.368686000 0.375077000

C 4.313440000 -3.093826000 -0.675875000

H 3.843993000 -3.844425000 -1.305816000

H 7.249448000 -2.543500000 0.598652000

N 5.600503000 -3.293474000 -0.383185000

O -3.652568000 -1.839294000 2.636136000

H -4.141527000 -2.552306000 2.204150000

**Table S30:** B3LYP-D/6-311G(d,p) optimized geometrical coordinates of dimer of INH13. The structure is global minima (absence of negative frequency).

**Electronic Energy = -1823.203573 Hartree**

C -3.327326000 -0.233299000 -1.551583000

O -3.997142000 0.593863000 -2.128339000

N -1.251761000 0.564721000 -2.404121000

N -1.946522000 -0.294277000 -1.603983000

H -1.476938000 -1.115698000 -1.237806000

C -3.954058000 -1.301283000 -0.686830000

C 0.024901000 0.448486000 -2.458192000

C 0.925080000 -0.473467000 -1.732394000

C 2.005790000 -1.034987000 -2.429889000

C 0.775340000 -0.766111000 -0.372629000

H -0.005024000 -0.291467000 0.208944000

H 2.134980000 -0.806093000 -3.483337000

C 1.683128000 -1.613616000 0.267873000

C 2.910230000 -1.898192000 -1.815519000

H 1.566018000 -1.809538000 1.325120000

C 2.733707000 -2.184963000 -0.438175000

O 3.676632000 -3.023801000 0.086838000

C 3.595838000 -3.360014000 1.466446000

H 4.430467000 -4.031574000 1.660031000

H 3.689556000 -2.470826000 2.100072000

H 2.655807000 -3.874203000 1.695334000

H 0.493301000 1.126061000 -3.169139000

C -5.302325000 -1.591863000 -0.897240000

C -3.292861000 -1.989151000 0.334163000

H -5.848062000 -1.056040000 -1.663225000

H -2.256336000 -1.792812000 0.583064000

C -5.912876000 -2.561058000 -0.108277000

C -4.000702000 -2.934923000 1.073511000

H -3.508632000 -3.476609000 1.876657000

H -6.958706000 -2.811055000 -0.261359000

N -5.285238000 -3.232487000 0.864460000

N 3.936309000 -2.520592000 -2.507853000

H 4.250779000 -2.058544000 -3.346772000

H 4.681820000 -2.884105000 -1.933858000

C -1.887617000 2.955247000 0.187968000

O -2.514235000 3.848280000 -0.336761000

N 0.226538000 3.697680000 -0.618736000

N -0.511569000 2.828129000 0.129508000

H -0.084381000 1.963569000 0.444746000

C -2.568380000 1.870041000 0.988012000

C 1.495796000 3.520816000 -0.682001000

C 2.347529000 2.512721000 -0.014620000

C 3.399464000 1.940533000 -0.746586000

C 2.181570000 2.146668000 1.325337000

H 1.425370000 2.624111000 1.935822000

H 3.541311000 2.225630000 -1.784581000

C 3.044755000 1.217543000 1.912044000

C 4.258546000 0.997497000 -0.186902000

H 2.916627000 0.964480000 2.955793000

C 4.066112000 0.637589000 1.171004000

O 4.964969000 -0.277712000 1.642889000

C 4.865651000 -0.691865000 2.999908000

H 5.665178000 -1.415004000 3.151227000

H 5.003228000 0.151729000 3.685725000

H 3.900647000 -1.170943000 3.199130000

H 1.998586000 4.215526000 -1.351727000

C -3.929304000 1.660867000 0.762924000

C -1.943907000 1.089567000 1.964569000

H -4.446432000 2.268605000 0.031554000

H -0.899122000 1.218161000 2.222969000

C -4.588841000 0.677893000 1.493231000

C -2.699371000 0.137826000 2.646936000

H -2.236182000 -0.475293000 3.415142000

H -5.645740000 0.490507000 1.327265000

N -3.996997000 -0.081599000 2.422670000

N 5.252849000 0.367057000 -0.917281000

H 5.591213000 0.862351000 -1.727439000

H 5.978408000 -0.067400000 -0.367544000

**Table S31:** B3LYP-D/6-311G(d,p) optimized geometrical coordinates of dimer of INH14. The structure is global minima (absence of negative frequency).

**Electronic Energy = -1896.972977 Hartree**

C -3.386689000 -0.841553000 -1.592544000

O -4.047448000 -0.268065000 -2.426244000

N -1.303578000 -0.260292000 -2.586588000

N -1.997463000 -0.846071000 -1.571335000

H -1.527778000 -1.509354000 -0.964477000

C -4.018222000 -1.616870000 -0.463203000

C -0.022513000 -0.304561000 -2.565238000

C 0.882151000 -0.862306000 -1.535398000

C 2.020668000 -1.554032000 -1.930468000

C 0.682982000 -0.667427000 -0.153089000

H -0.158628000 -0.079286000 0.193431000

H 2.223175000 -1.697805000 -2.985515000

C 1.569663000 -1.179291000 0.771078000

C 2.937098000 -2.090193000 -1.004742000

H 1.426378000 -1.023642000 1.832871000

C 2.704220000 -1.911231000 0.378951000

O 3.452057000 -2.345660000 1.409487000

C 4.606583000 -3.180773000 1.241874000

H 4.353715000 -4.105780000 0.720014000

H 5.401275000 -2.658346000 0.707212000

H 4.933221000 -3.408225000 2.254573000

H 0.447751000 0.125494000 -3.446403000

C -5.337425000 -2.039280000 -0.630645000

C -3.390476000 -1.907384000 0.751015000

H -5.858954000 -1.806277000 -1.550052000

H -2.382267000 -1.576618000 0.972463000

C -5.951730000 -2.746717000 0.397515000

C -4.099836000 -2.614466000 1.720252000

H -3.634967000 -2.845297000 2.674643000

H -6.974392000 -3.094838000 0.286353000

N -5.354786000 -3.039491000 1.558749000

C 4.065258000 -2.770481000 -1.558211000

N 4.954111000 -3.302494000 -2.070060000

C -2.353872000 2.777083000 -0.508017000

O -2.990324000 3.423617000 -1.306434000

N -0.244553000 3.389115000 -1.425367000

N -0.965492000 2.743608000 -0.466764000

H -0.518065000 2.028099000 0.095979000

C -3.017841000 1.932922000 0.551181000

C 1.034957000 3.318128000 -1.388519000

C 1.912368000 2.667965000 -0.389767000

C 3.044064000 1.985053000 -0.818346000

C 1.694575000 2.763903000 1.000120000

H 0.858554000 3.341272000 1.376961000

H 3.260863000 1.915787000 -1.878065000

C 2.556566000 2.167661000 1.896647000

C 3.935318000 1.363883000 0.078368000

H 2.399083000 2.247102000 2.964847000

C 3.683509000 1.444513000 1.467957000

O 4.406420000 0.920345000 2.474257000

C 5.547786000 0.077318000 2.262063000

H 5.286230000 -0.801364000 1.669254000

H 6.360571000 0.622104000 1.779447000

H 5.853759000 -0.230852000 3.259760000

H 1.527286000 3.802856000 -2.228280000

C -4.341790000 1.550164000 0.333424000

C -2.415274000 1.541023000 1.749562000

H -4.843997000 1.860810000 -0.573703000

H -1.404799000 1.834543000 2.009785000

C -4.985641000 0.780832000 1.297029000

C -3.153195000 0.778280000 2.653040000

H -2.708156000 0.468329000 3.594379000

H -6.012667000 0.462131000 1.145273000

N -4.413055000 0.391208000 2.441957000

C 5.059429000 0.704301000 -0.507457000

N 5.946389000 0.194199000 -1.044287000

**Table S32:** B3LYP-D/6-311G(d,p) optimized geometrical coordinates of dimer of INH15. The structure is global minima (absence of negative frequency).

**Electronic Energy = -1979.939513 Hartree**

C -3.263754000 0.439919000 0.929432000

O -3.889915000 -0.501904000 1.359680000

N -1.142970000 -0.620113000 1.153702000

N -1.889593000 0.449896000 0.759542000

H -1.427095000 1.330982000 0.562955000

C -3.940376000 1.725646000 0.518149000

C 0.131490000 -0.557848000 1.022355000

C 0.970490000 0.517623000 0.447263000

C 2.180222000 0.826866000 1.084358000

C 0.638832000 1.186280000 -0.737774000

H -0.250014000 0.914141000 -1.293895000

H 2.447625000 0.263931000 1.969422000

C 1.483472000 2.178789000 -1.225102000

C 3.047241000 1.819496000 0.610434000

H 1.248977000 2.720132000 -2.133899000

C 2.652672000 2.522040000 -0.558040000

O 3.418371000 3.527983000 -1.098517000

C 3.490366000 4.729805000 -0.313395000

H 2.491141000 5.160001000 -0.186788000

H 3.935476000 4.535338000 0.665247000

H 4.114068000 5.421549000 -0.878339000

H 0.654226000 -1.425077000 1.420162000

C -5.216054000 1.972615000 1.026634000

C -3.399230000 2.664509000 -0.364212000

H -5.672448000 1.250501000 1.691370000

H -2.431293000 2.525626000 -0.831841000

C -5.872547000 3.141893000 0.657188000

C -4.145209000 3.799636000 -0.676221000

H -3.747244000 4.539307000 -1.365361000

H -6.862117000 3.359930000 1.048159000

N -5.357764000 4.052054000 -0.177909000

C 4.433832000 1.657967000 2.620003000

C 5.475719000 2.030885000 0.459349000

H 5.777241000 0.979501000 0.334430000

H 5.329085000 2.473589000 -0.522584000

H 6.285481000 2.564255000 0.963156000

H 5.294329000 2.166643000 3.059662000

H 3.556722000 1.890228000 3.226412000

H 4.622666000 0.572921000 2.672320000

N 4.252168000 2.147248000 1.261681000

C -3.109102000 -3.181353000 0.021788000

O -3.761999000 -4.131912000 0.388372000

N -1.022804000 -4.323835000 0.139205000

N -1.737189000 -3.203461000 -0.164350000

H -1.247494000 -2.325650000 -0.300404000

C -3.746483000 -1.846983000 -0.283610000

C 0.251614000 -4.293475000 -0.003323000

C 1.120210000 -3.205778000 -0.507055000

C 2.346077000 -2.984883000 0.135928000

C 0.799001000 -2.439532000 -1.634487000

H -0.104106000 -2.639995000 -2.198039000

H 2.603538000 -3.621133000 0.972971000

C 1.671355000 -1.441294000 -2.056980000

C 3.240938000 -1.988262000 -0.273474000

H 1.445817000 -0.825855000 -2.919718000

C 2.858161000 -1.187435000 -1.381057000

O 3.651528000 -0.169242000 -1.854538000

C 3.771749000 0.967218000 -0.982768000

H 2.788834000 1.419045000 -0.811662000

H 4.220101000 0.685373000 -0.027140000

H 4.412438000 1.678736000 -1.502321000

H 0.749074000 -5.204721000 0.321872000

C -5.007904000 -1.597438000 0.258098000

C -3.183278000 -0.862639000 -1.100147000

H -5.481382000 -2.352177000 0.872758000

H -2.225373000 -0.997495000 -1.589125000

C -5.628638000 -0.382925000 -0.014542000

C -3.893998000 0.316440000 -1.316930000

H -3.478576000 1.092416000 -1.953867000

H -6.606299000 -0.162718000 0.404189000

N -5.092257000 0.570123000 -0.785761000

C 4.641854000 -2.345424000 1.700599000

C 5.673457000 -1.845432000 -0.439220000

H 5.938320000 -2.893734000 -0.646195000

H 5.531674000 -1.325671000 -1.383374000

H 6.505736000 -1.378107000 0.092698000

H 5.523354000 -1.899547000 2.166064000

H 3.779267000 -2.130892000 2.333781000

H 4.794787000 -3.436915000 1.669268000

N 4.462768000 -1.749827000 0.385066000


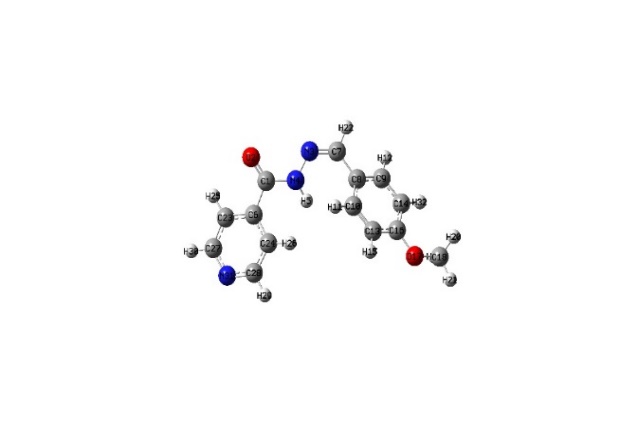


INH1


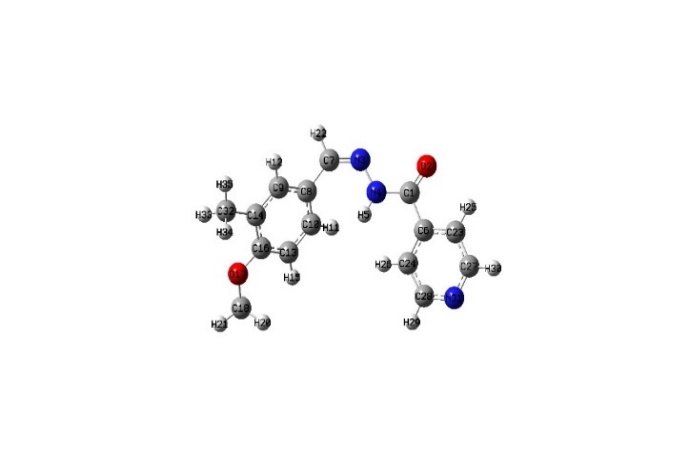


INH2


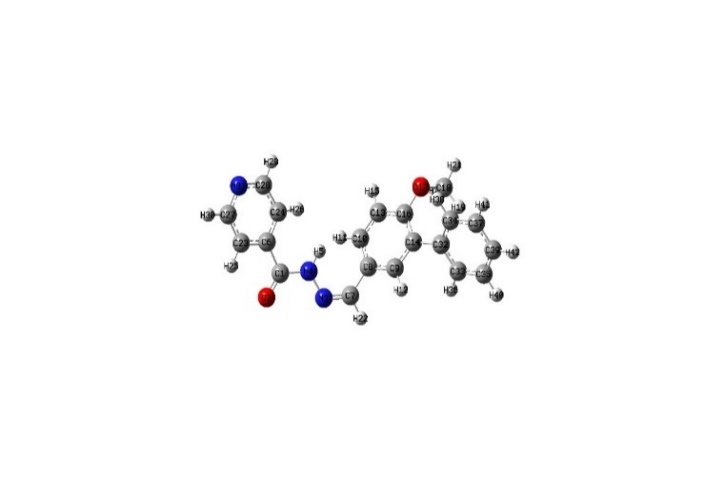


INH3


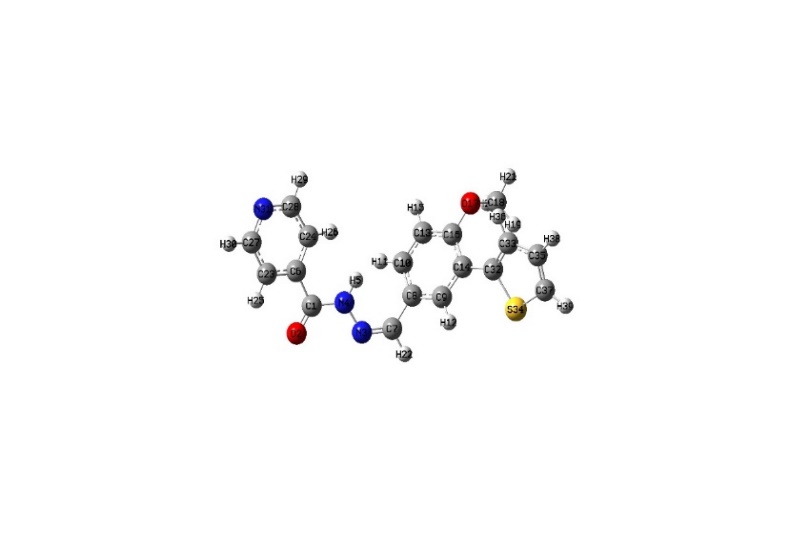


INH4


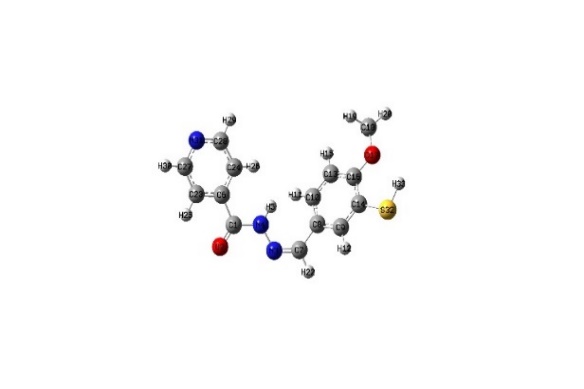


INH5


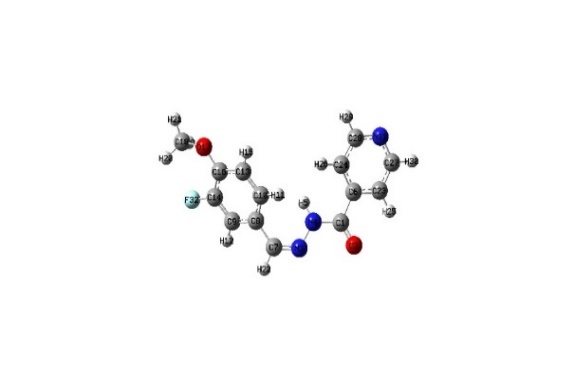


INH6


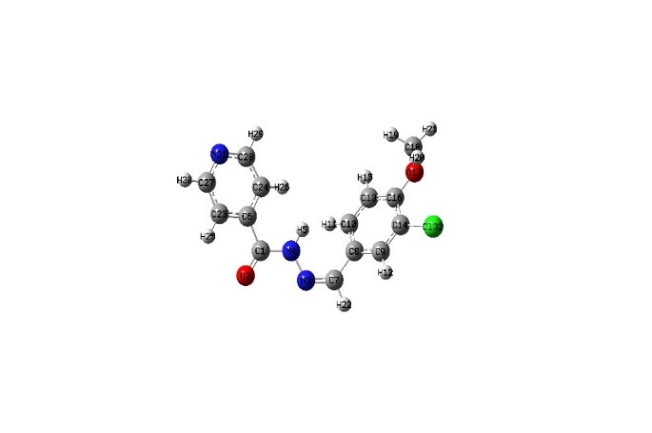


INH7


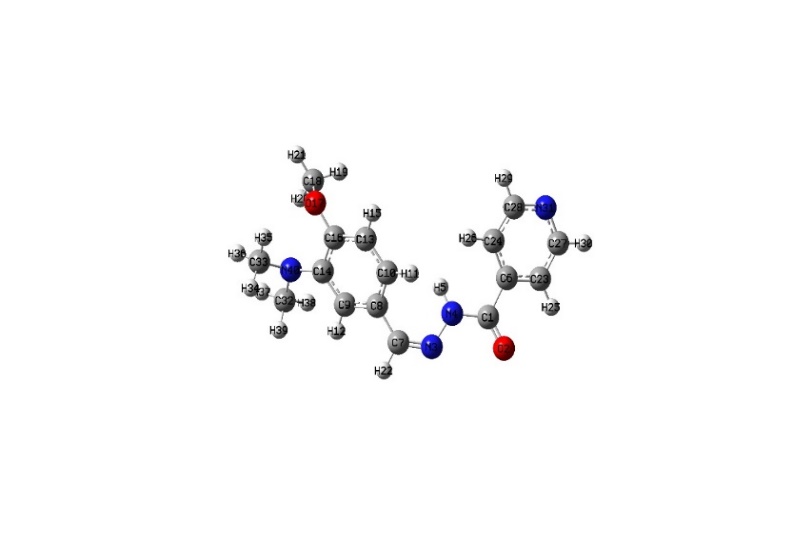


INH16


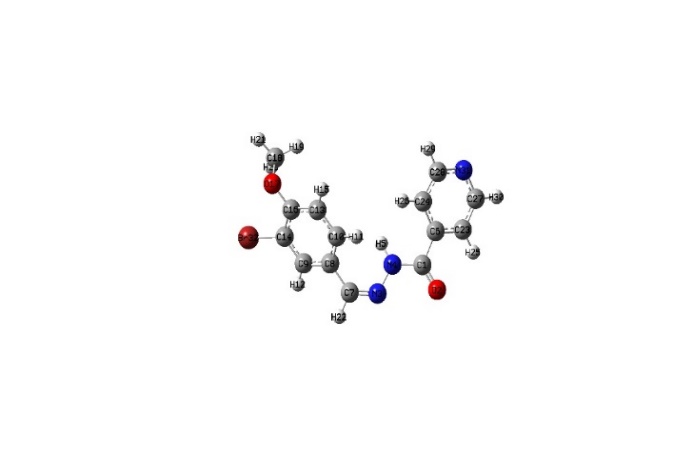


INH8


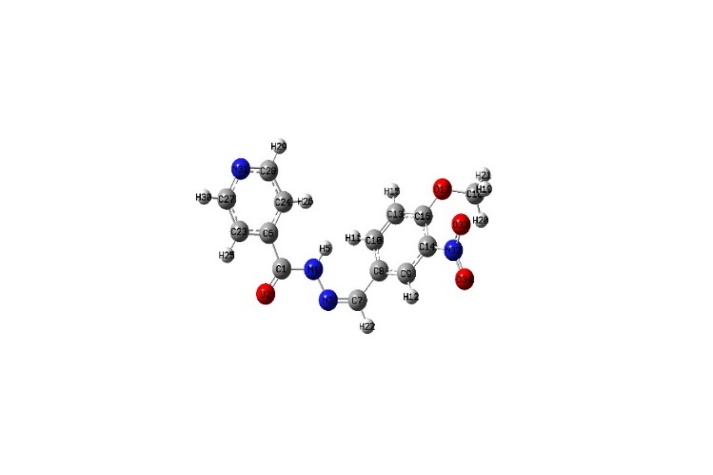


INH9


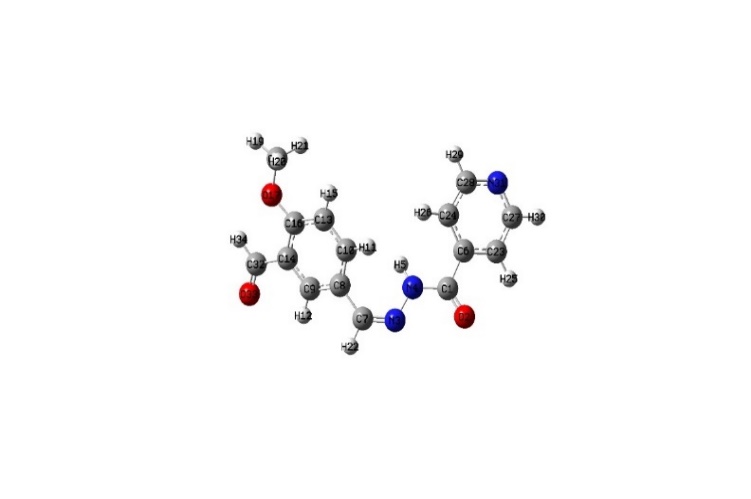


INH10


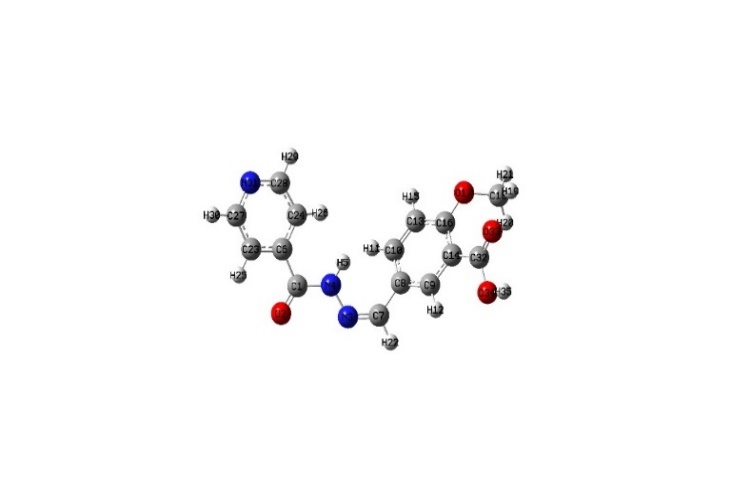


INH11


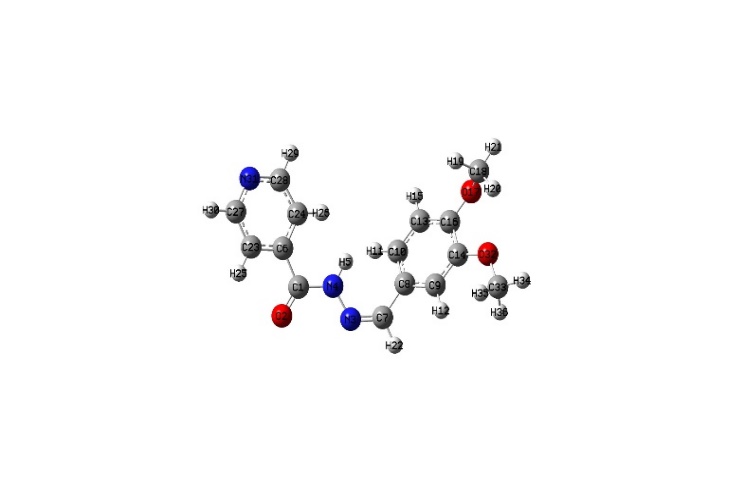


INH12


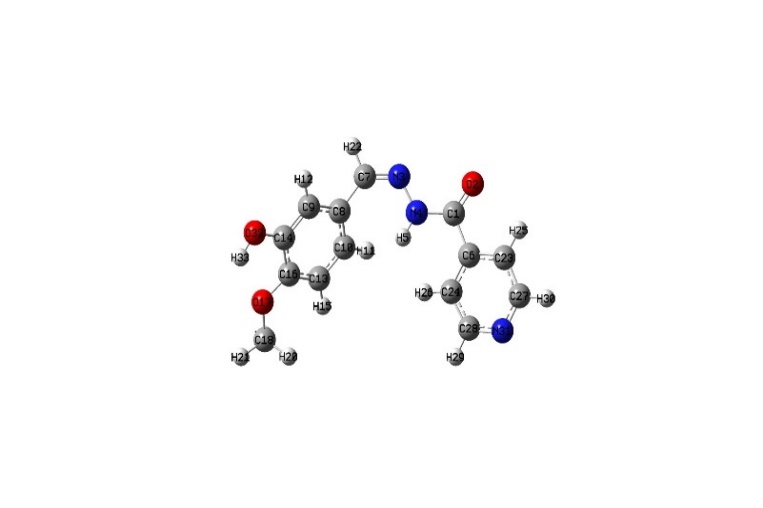


INH13


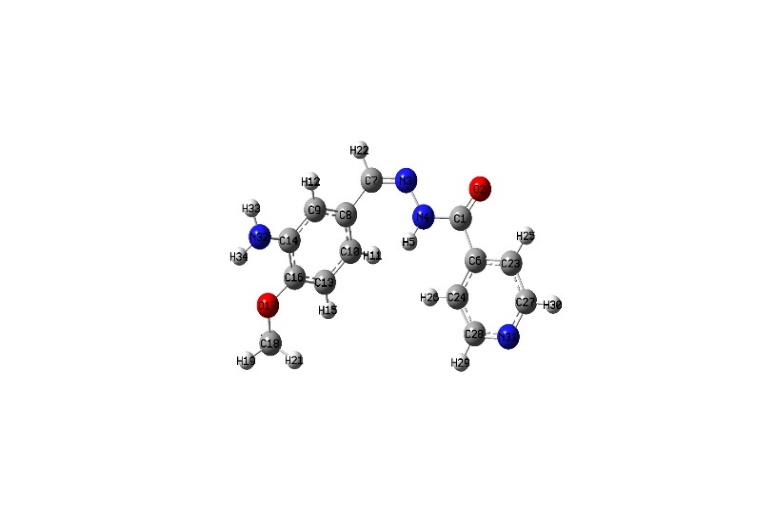


INH14


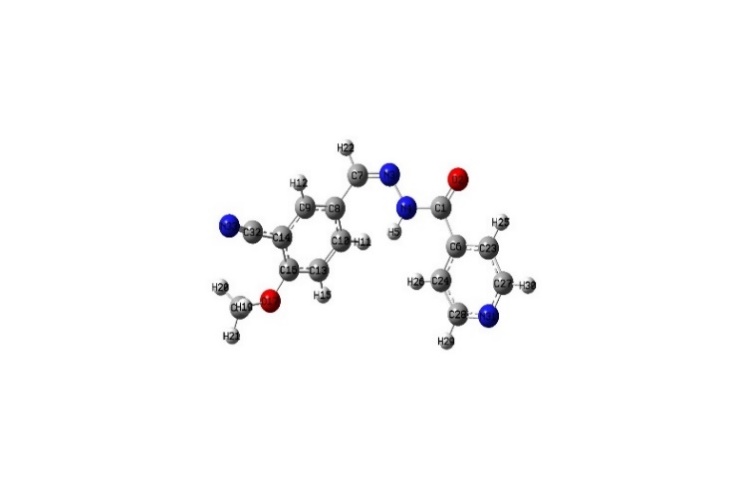


INH15

**Figure S1:** Optimized structures of the studied compounds obtained at B3LYP-D/6-311G(d,p) level of theory in gas phase.

**Oscillator Strength**

**Wavelength**

**Figure S2:** UV-vis spectra of the studied compounds, calculated at CAM-B3LYP/6-311G(d,p) level of theory in gas phase.
